# Supplementary material for: Large vibrationally induced parity violation effects in CHDBrI+
Source: Royal Society of Chemistry journal article supplement (doi:10.1039/d3cc03787h), 2023-01-01
Supplement: d3cc03787h1.pdf [file d3cc03787h1.pdf]

# Electronic Supporting Information: Large Vibrationally Induced Parity Violation Effects in CHDBrI<sup>+</sup>

Eduardus,<sup>†</sup> Yuval Shagam,<sup>‡</sup> Arie Landau,<sup>¶</sup> Shirin Faraji,<sup>§</sup> Peter Schwerdtfeger,<sup>||</sup>  
Anastasia Borschevsky,<sup>†</sup> and Lukáš F. Pašteka<sup>\*,†,⊥</sup>

<sup>†</sup>*Van Swinderen Institute for Particle Physics and Gravity (VSI), University of Groningen,  
Groningen, The Netherlands*

<sup>‡</sup>*Schulich Faculty of Chemistry, Solid State Institute and The Helen Diller Quantum  
Center, Technion-Israel Institute of Technology, Haifa 32000, Israel*

<sup>¶</sup>*Schulich Faculty of Chemistry, The Helen Diller Quantum Center and The Institute of  
Advanced Studies in Theoretical Chemistry, Technion-Israel Institute of Technology, Haifa  
32000, Israel*

<sup>§</sup>*Zernike Institute for Advanced Materials, Faculty of Science and Engineering, University  
of Groningen, Nijenborgh 4, 9747AG Groningen The Netherlands*

<sup>||</sup>*Centre for Theoretical Chemistry and Physics, The New Zealand Institute for Advanced  
Study, Massey University Auckland, Private Bag 102904, 0632 Auckland, New Zealand*

<sup>⊥</sup>*Department of Physical and Theoretical Chemistry, Faculty of Natural Sciences,  
Comenius University, Mlynská dolina, 84215 Bratislava, Slovakia*

E-mail: l.f.pasteka@rug.nl

In this supporting information, we provide additional data for the geometries, vibrational harmonic and anharmonic treatment of CH<sub>2</sub>BrI, CHDBrI, CH<sub>2</sub>BrI<sup>+</sup> and CHDBrI<sup>+</sup> using vibrational perturbation theory<sup>1-4</sup> and a few selected density functionals, as well as for parity violation (PV) contributions calculated using the CAMB3LYP\* functional,<sup>5</sup> as described in Section S1. Data in Sections S2 – S4 are presented in order to validate the methodology used in optimization, vibrational analysis and PV calculation, respectively, with respect to different levels of theory as well as experimental data available for CH<sub>2</sub>BrI. Data in Sections S5 – S8 are presented as further analysis of the parity violation effects in CH<sub>2</sub>BrI<sup>+</sup> and CHDBrI<sup>+</sup>.

## S1. Computational Details

Geometry optimization and frequency analyses for CHDBrI and CHDBrI<sup>+</sup> were carried out in Q-Chem 5.2.2<sup>6</sup> program package using the  $\omega$ B97M-V density functional<sup>7</sup> together with Def2-QZVPPD basis set.<sup>8</sup> In the case of iodine the core was replaced by a scalar relativistic Stuttgart pseudopotential. Calculations using the PBE, PB86, B3LYP, MN15 and  $\omega$ B97X-D functionals were performed in Gaussian 16.<sup>9</sup> CCSD(T) calculations were performed in Molpro 2021.2.0.<sup>10</sup>

Displacement vectors from the vibrational normal modes were used to determine the potential energy  $V(q)$  from 11 evenly spaced points  $q_i$  between  $-0.5 \text{ \AA}$  and  $0.5 \text{ \AA}$ . Along the normal mode, the PV energy contributions were obtained. For this we used the PV Hamiltonian as derived from a Z boson exchange between the electrons and nucleons given by<sup>11</sup>

$$\hat{H}_{\text{PV}} = \frac{G_{\text{F}}}{2\sqrt{2}} \sum_A^{\text{nuclei}} Q_{\text{w}}(A) \sum_i^{\text{electrons}} \gamma_i^5 \rho_A(\vec{R}_A - \vec{r}_i). \quad (\text{S1})$$

Here,  $G_{\text{F}}=2.22255 \times 10^{-14}$  a.u. is the Fermi coupling constant,  $Q_{\text{w}}(A)=(1-4 \sin^2 \theta_{\text{W}})Z_A - N_A$  the weak charge of nucleus  $A$ ,  $\theta_{\text{W}}=0.2312$  the Weinberg mixing angle, and  $Z_A$  and  $N_A$  are the numbers of protons and neutrons inside nucleus  $A$  respectively.  $\gamma_i^5$  is the Dirac  $\gamma^5$ -matrix

in the standard representation and  $\rho_A(\vec{r})$  the nuclear charge density.

The PV energy shift is given by the expectation value  $E^{\text{PV}}(q) = \langle \Psi^{\text{el}}(q) | H^{\text{PV}}(q) | \Psi^{\text{el}}(q) \rangle$  along a specific normal coordinate  $q(\vec{R}_A)$  (see Figure 1 in the main paper). Because of the structure of the PV operator, the PV energy shift can be broken down into the individual atomic contributions,  $E^{\text{PV}}(q) = \sum_A E_A^{\text{PV}}(q)$ , required for a more detailed analysis. Within mean field theory such as Kohn–Sham, the contributions can be further broken down into the ones coming from the individual molecular orbitals  $\sum_i \langle \phi_i^{\text{el}}(q) | \hat{H}^{\text{PV}}(i, q) | \phi_i^{\text{el}}(q) \rangle$ , where  $\phi_i$  are the occupied Kohn–Sham orbitals.

The  $E^{\text{PV}}(q)$  values are obtained from relativistic density functional calculations using X2C/AMFI<sup>12,13</sup> Hamiltonian and the CAM-B3LYP\* functional tailored for PV calculations,<sup>5</sup> combined with the augmented uncontracted relativistic Dyall.av4z basis set<sup>14</sup> in DIRAC23 program package.<sup>15</sup> To treat the open-shell cationic species, we have used the average-of-configurations (AOC) formalism in noncollinear approximation.

To generate the PV shift for a specific vibrational mode  $|n\rangle$  we used the numerical Numerov–Cooley (NC) procedure<sup>16–18</sup> as well as vibrational perturbation theory (VPT) for interpretational purposes, i.e. along a vibrational normal coordinate  $q$  we obtain for a single normal mode up to the linear term in  $(n + \frac{1}{2})$ ,<sup>19</sup>

$$\begin{aligned} E_n^{\text{PV}} &= \langle n(q) | \hat{H}^{\text{PV}}(q) | n(q) \rangle \\ &= E^{\text{PV}}(q=0) + E_{\text{curvature}}^{\text{PV}} + E_{\text{anharmonic}}^{\text{PV}} \\ &= E^{\text{PV}}(q=0) + \frac{\hbar}{\mu\omega_e} \left( \left. \frac{\partial^2 E^{\text{PV}}(q)}{\partial q^2} \right|_{q=0} - \frac{1}{\mu\omega_e^2} \left. \frac{\partial E^{\text{PV}}(q)}{\partial q} \right|_{q=0} \left. \frac{\partial^3 V}{\partial q^3} \right|_{q=0} \right) \left( n + \frac{1}{2} \right), \end{aligned} \quad (\text{S2})$$

where  $V(q)$  is the potential energy along the normal coordinate and  $\omega_e$  is the harmonic vibrational frequency. We call the first term in Eq. (S2) the PV curvature term and the second one the anharmonicity term. Both the potential  $V(q)$  and PV energy contribution  $E^{\text{PV}}(q)$  for one of the enantiomers are fitted to a polynomial up to the sixth order. We carefully checked the numerical procedures for stability. However, there are some modes

which lead to second derivatives  $\partial^2 E^{\text{PV}}/\partial q^2$  close to zero where it was difficult to accurately predict this value. The PV energy difference for the vibrational transitions of the two enantiomers (S, R) is given by  $\Delta E_{n \rightarrow n'}^{\text{PV}} = (E_{n \rightarrow n'}^{\text{R,PV}} - E_{n \rightarrow n'}^{\text{S,PV}}) = 2E_{n \rightarrow n'}^{\text{R,PV}}$ , and similarly for the PV contribution to the vibrational (anharmonic) transition we have  $h\Delta\nu_{n \rightarrow n'}^{\text{PV}} = \Delta E_{n \rightarrow n'}^{\text{PV}}$ .

The selected computational methodology was benchmarked against other DFT functionals, CCSD(T) and available experimental data for structural parameters and vibrational frequencies of  $\text{CH}_2\text{BrI}$ ,  $\text{CHDBrI}$ ,  $\text{CH}_2\text{BrI}^+$  and  $\text{CHDBrI}^+$ . The sensitivity of the vibrational PV shift to the level of theory was also tested. Details can be found in the following sections.

From the theoretical point of view, further improvements on the accuracy of the predicted PV shift can be achieved by using a high-accuracy method for treatment of correlation, such as the relativistic coupled cluster approach and by performing a multi-mode PV analysis,<sup>20</sup> both of which are however computationally very demanding.

## S2. Geometries

Table S1 summarizes the optimized bond distances and angles for  $\text{CH}_2\text{BrI}$  and  $\text{CH}_2\text{BrI}^+$  and dipole moments for  $\text{CH}_2\text{BrI}$ , obtained with different DFT functionals and the Def2-QZVPPD basis set.<sup>8</sup> We have also performed geometry optimization using the coupled cluster approach with single, double, and perturbative triple excitations (CCSD(T)) with 40 (39) correlated electrons (corresponding to the frozen core approximation up to  $-5$  a.u.). As can be seen, the  $\omega\text{B97M-V}$  functional<sup>7</sup> bond lengths and angles are in excellent agreement with the results obtained using CCSD(T) and also compare well to the experimentally derived  $r_0$ -structural parameters of  $\text{CH}_2\text{BrI}$ .<sup>21</sup>

We note that for the positively charged species care has to be taken as the geometry optimization may lead to a minimum with the hole, caused by the removal of an electron, being artificially localized at the iodine atom. This state lies 0.0123 a.u. (32 kJ/mol) above the global minimum where the hole is partially delocalized over both halogen atoms. This

artificial localization leads to unreasonable values for the vibrational spectrum and intensities in the lower frequency range and should therefore to be avoided.

Table S1: Equilibrium bond lengths  $r_e$  (in Å), bond angles  $\alpha$  (in degrees), and dipole moments (in Debye, neutral molecule only) for  $\text{CH}_2\text{BrI}$  and  $\text{CH}_2\text{BrI}^+$  obtained from various DFT and CCSD(T) calculations and compared to experimentally derived parameters.<sup>21</sup>

| Molecule                  | Property               | PBE   | PB86  | B3LYP | $\omega\text{B97X-D}$ | $\omega\text{B97M-V}$ | CCSD(T) | Exp. <sup>a</sup> |
|---------------------------|------------------------|-------|-------|-------|-----------------------|-----------------------|---------|-------------------|
| $\text{CH}_2\text{BrI}$   | $r_e(\text{CH})$       | 1.090 | 1.089 | 1.080 | 1.081                 | 1.080                 | 1.082   | (1.083)           |
|                           | $r_e(\text{CBr})$      | 1.940 | 1.946 | 1.943 | 1.926                 | 1.923                 | 1.923   | 1.926             |
|                           | $r_e(\text{CI})$       | 2.150 | 2.156 | 2.150 | 2.125                 | 2.121                 | 2.123   | (2.131)           |
|                           | $\alpha(\text{HCH})$   | 112.4 | 112.5 | 112.2 | 111.4                 | 111.5                 | 111.9   | 107.7             |
|                           | $\alpha(\text{HCBBr})$ | 107.8 | 107.8 | 107.7 | 107.9                 | 108.0                 | 108.0   | 107.3             |
|                           | $\alpha(\text{HCI})$   | 107.0 | 107.0 | 107.1 | 107.6                 | 107.7                 | 107.5   | –                 |
|                           | $\alpha(\text{BrCI})$  | 114.9 | 114.9 | 114.9 | 114.6                 | 113.9                 | 113.9   | 113.5             |
|                           | $\mu_e$                | 1.262 | 1.277 | 1.309 | 1.327                 | 1.321                 | 1.318   | –                 |
| $\text{CH}_2\text{BrI}^+$ | $r_e(\text{CH})$       | 1.091 | 1.091 | 1.081 | 1.082                 | 1.080                 | 1.084   | –                 |
|                           | $r_e(\text{CBr})$      | 1.939 | 1.944 | 1.937 | 1.921                 | 1.917                 | 1.922   | –                 |
|                           | $r_e(\text{CI})$       | 2.143 | 2.151 | 2.146 | 2.118                 | 2.115                 | 2.120   | –                 |
|                           | $\alpha(\text{HCH})$   | 116.4 | 116.5 | 116.1 | 115.6                 | 115.6                 | 116.5   | –                 |
|                           | $\alpha(\text{HCBBr})$ | 111.1 | 111.0 | 111.1 | 111.4                 | 111.9                 | 111.4   | –                 |
|                           | $\alpha(\text{HCI})$   | 110.8 | 110.7 | 110.6 | 111.3                 | 110.7                 | 111.0   | –                 |
|                           | $\alpha(\text{BrCI})$  | 94.5  | 94.8  | 95.4  | 93.7                  | 94.1                  | 93.1    | –                 |

<sup>a</sup>  $r_0$ -structure derived from isotopic substitution rotational spectra. Numbers in parentheses were fixed to *ab initio* data in the fitting procedure.

### S3. Vibrational Analysis

Tables S2–S5 summarize the calculated harmonic and anharmonic vibrational frequencies, intensities and lifetimes for the different molecules at different levels of density functional theory using vibrational perturbation theory. Modes 1 to 7 are fairly harmonic in their nature (see Figure S3) and thus the harmonic approximation introduces only a relatively small error in vibrational frequencies compared to the anharmonic results ( $< 40 \text{ cm}^{-1}$ ). The C–H/D stretching modes 8 and 9 are the most anharmonic and the error of the harmonic

approximation is also the largest ( $100 - 200 \text{ cm}^{-1}$ ). For  $\text{CH}_2\text{BrI}$  the smallest root mean square deviation from experiment<sup>22,23</sup> is obtained for the B3LYP and  $\omega\text{B97M-V}$  functionals.<sup>7</sup>

For the radical cationic systems, the open-shell formalism potentially plays a significant role in the correct description of the electronic structure. We therefore calculated the main species of interest,  $\text{CHDBrI}^+$ , with UKS as well as ROKS formalism using two functionals ( $\omega\text{B97X-D}$  and MN15), two basis sets (Def2-QZVPPD, Def2-TZVP), and two optimization point groups ( $C_s$  and  $C_1$ ). The results are collected in Table S6 and Figure S1 below. The  $V(q)$  curves are virtually indistinguishable and harmonic frequencies agree to a very high degree. While still small, the largest effect is that of the DFT functional ( $< 1\%$ ). Interestingly, while the effect of the DFT functional grows with the mode frequency, the effect of the open-shell formalism exhibits an opposite trend – the UKS and ROKS frequencies agree within 0.01% for the highest mode and within 0.3% for the lowest.

In Figure S2, we show comparison of the  $V(q)$  curves obtained from fully relativistic DIRAC calculations and pseudo-relativistic (ECP) Q-Chem calculations as described in Section S1. Both were calculated in the same set of displaced geometries based on the harmonic vibrational analysis performed in Q-Chem. As can be seen from the plots, the potentials between the two computational approaches agree to a high degree. Qualitative agreement can be observed for all modes. For most modes, we can also confirm quantitative agreement, except for vibrational mode 1, for which the DIRAC potential is somewhat shifted with respect to the Q-Chem potential. In all evaluations of vibrational wavefunctions we use the Q-Chem potentials as these are based on the Q-Chem optimized structure and harmonic analysis.

Table S2: Vibrational harmonic (harm) and anharmonic (anharm) fundamental transition frequencies (in  $\text{cm}^{-1}$ ) for the molecules  $\text{CH}_2\text{BrI}$ ,  $\text{CH}_2\text{BrI}^+$ ,  $\text{CHDBrI}$ , and  $\text{CHDBrI}^+$  obtained from a 3-mode analysis.

| Mode                                        | PBE<br>harm | PBE<br>anharm | PB86<br>harm | PB86<br>anharm | B3LYP<br>harm | B3LYP<br>anharm | $\omega\text{B97X-D}$<br>harm | $\omega\text{B97X-D}$<br>anharm | $\omega\text{B97M-V}$<br>harm | $\omega\text{B97M-V}$<br>anharm | Exp. <sup>22,23</sup> |
|---------------------------------------------|-------------|---------------|--------------|----------------|---------------|-----------------|-------------------------------|---------------------------------|-------------------------------|---------------------------------|-----------------------|
| <b><math>\text{CH}_2\text{BrI}</math></b>   |             |               |              |                |               |                 |                               |                                 |                               |                                 |                       |
| 1                                           | 136.3       | 136.0         | 135.3        | 136.6          | 140.2         | 143.3           | 145.9                         | 143.0                           | 146.4                         | 144.9                           | 144                   |
| 2                                           | 508.9       | 499.7         | 503.1        | 493.2          | 515.1         | 505.3           | 545.0                         | 535.0                           | 548.4                         | 540.8                           | 517                   |
| 3                                           | 599.2       | 582.3         | 588.6        | 572.6          | 608.2         | 593.4           | 663.2                         | 644.2                           | 671.2                         | 652.9                           | 616                   |
| 4                                           | 739.2       | 732.4         | 738.9        | 732.3          | 764.6         | 757.7           | 775.3                         | 767.5                           | 774.5                         | 763.4                           | 754                   |
| 5                                           | 1047.6      | 1030.0        | 1046.9       | 1028.1         | 1089.4        | 1072.2          | 1112.0                        | 1078.4                          | 1107.4                        | 1087.6                          | 1065                  |
| 6                                           | 1126.4      | 1106.8        | 1127.5       | 1107.8         | 1178.3        | 1159.3          | 1200.1                        | 1163.1                          | 1191.9                        | 1168.1                          | 1150                  |
| 7                                           | 1368.3      | 1328.7        | 1370.0       | 1329.3         | 1426.0        | 1386.0          | 1441.5                        | 1402.6                          | 1433.9                        | 1369.7                          | 1374                  |
| 8                                           | 3059.5      | 2933.7        | 3052.6       | 2924.6         | 3133.4        | 3009.7          | 3148.4                        | 2957.4                          | 3151.2                        | 3019.3                          | 2978                  |
| 9                                           | 3147.9      | 3002.0        | 3141.8       | 2994.4         | 3220.8        | 3077.0          | 3233.6                        | 3021.3                          | 3232.6                        | 3083.5                          | 3091                  |
| RMSD                                        | 37.7        | 42.6          | 35.7         | 46.6           | 72.9          | 17.4            | 84.9                          | 28.9                            | 84.6                          | 24.4                            |                       |
| <b><math>\text{CH}_2\text{BrI}^+</math></b> |             |               |              |                |               |                 |                               |                                 |                               |                                 |                       |
| 1                                           | 135.6       | 134.9         | 133.9        | 138.7          | 137.0         | 128.4           | 153.3                         | 159.9                           | 152.3                         |                                 |                       |
| 2                                           | 515.3       | 493.3         | 505.3        | 485.0          | 509.4         | 487.9           | 551.0                         | 535.8                           | 538.5                         |                                 |                       |
| 3                                           | 603.2       | 585.3         | 594.1        | 582.9          | 605.8         | 589.2           | 645.7                         | 637.4                           | 651.0                         |                                 |                       |
| 4                                           | 794.3       | 790.9         | 793.9        | 788.5          | 821.9         | 813.6           | 837.4                         | 827.5                           | 835.3                         |                                 |                       |
| 5                                           | 981.9       | 963.0         | 981.8        | 965.5          | 1020.9        | 997.9           | 1033.9                        | 1029.6                          | 1028.7                        |                                 |                       |
| 6                                           | 1095.3      | 1073.9        | 1096.7       | 1079.1         | 1140.7        | 1119.3          | 1154.5                        | 1146.9                          | 1143.9                        |                                 |                       |
| 7                                           | 1361.5      | 1324.4        | 1363.4       | 1327.2         | 1417.5        | 1378.0          | 1431.7                        | 1396.0                          | 1422.5                        |                                 |                       |
| 8                                           | 3054.6      | 2930.8        | 3048.0       | 2925.0         | 3129.8        | 3008.3          | 3145.6                        | 3000.3                          | 3150.9                        |                                 |                       |
| 9                                           | 3168.1      | 3027.9        | 3162.6       | 3020.5         | 3242.2        | 3101.4          | 3256.8                        | 3089.5                          | 3259.7                        |                                 |                       |
| <b><math>\text{CHDBrI}</math></b>           |             |               |              |                |               |                 |                               |                                 |                               |                                 |                       |
| 1                                           | 136.0       | 128.6         | 135.0        | 129.4          | 139.9         | 139.8           | 145.6                         | 130.9                           | 146.3                         |                                 |                       |
| 2                                           | 492.0       | 478.5         | 486.6        | 476.5          | 498.1         | 488.2           | 525.6                         | 513.5                           | 539.5                         |                                 |                       |
| 3                                           | 583.8       | 564.9         | 574.1        | 558.0          | 592.8         | 577.1           | 641.0                         | 618.7                           | 644.6                         |                                 |                       |
| 4                                           | 636.9       | 627.4         | 636.2        | 629.1          | 658.0         | 650.9           | 669.3                         | 658.2                           | 679.2                         |                                 |                       |
| 5                                           | 790.8       | 771.4         | 789.8        | 774.4          | 823.8         | 809.4           | 847.0                         | 817.9                           | 845.1                         |                                 |                       |
| 6                                           | 1090.1      | 1064.2        | 1090.6       | 1067.7         | 1138.3        | 1117.6          | 1161.1                        | 1117.0                          | 1155.6                        |                                 |                       |
| 7                                           | 1217.3      | 1183.2        | 1218.8       | 1185.8         | 1268.3        | 1235.1          | 1281.8                        | 1248.4                          | 1283.9                        |                                 |                       |
| 8                                           | 2276.5      | 2202.1        | 2271.7       | 2197.5         | 2330.7        | 2259.6          | 2341.2                        | 2237.2                          | 2345.8                        |                                 |                       |
| 9                                           | 3106.8      | 2965.8        | 3100.3       | 2958.0         | 3180.1        | 3042.5          | 3193.8                        | 2989.1                          | 3198.0                        |                                 |                       |
| <b><math>\text{CHDBrI}^+</math></b>         |             |               |              |                |               |                 |                               |                                 |                               |                                 |                       |
| 1                                           | 135.4       | 136.1         | 133.7        | 128.3          | 136.8         | 130.9           | 153.1                         | 149.0                           | 149.1                         |                                 |                       |
| 2                                           | 499.1       | 481.4         | 490.2        | 471.0          | 494.9         | 476.6           | 532.3                         | 517.5                           | 524.4                         |                                 |                       |
| 3                                           | 582.4       | 570.7         | 574.4        | 560.4          | 585.9         | 572.2           | 620.6                         | 607.2                           | 619.8                         |                                 |                       |
| 4                                           | 674.2       | 668.8         | 673.0        | 663.8          | 696.7         | 689.6           | 713.8                         | 702.5                           | 709.9                         |                                 |                       |
| 5                                           | 755.9       | 744.5         | 755.0        | 738.3          | 783.7         | 769.1           | 797.1                         | 787.6                           | 796.5                         |                                 |                       |
| 6                                           | 1047.3      | 1029.8        | 1048.1       | 1026.6         | 1090.2        | 1073.2          | 1104.8                        | 1091.4                          | 1103.8                        |                                 |                       |
| 7                                           | 1216.2      | 1188.0        | 1217.8       | 1185.7         | 1265.9        | 1233.3          | 1279.0                        | 1247.0                          | 1274.9                        |                                 |                       |
| 8                                           | 2281.5      | 2211.5        | 2277.0       | 2204.2         | 2336.7        | 2266.3          | 2348.4                        | 2263.2                          | 2354.0                        |                                 |                       |
| 9                                           | 3116.3      | 2982.6        | 3110.3       | 2973.2         | 3190.8        | 3057.3          | 3205.9                        | 3044.9                          | 3213.8                        |                                 |                       |

Table S3: Harmonic (harm) and anharmonic (anharm) IR intensities (in km/mol) for the fundamental transitions of the molecules CH<sub>2</sub>BrI, CH<sub>2</sub>BrI<sup>+</sup>, CHDBrI, and CHDBrI<sup>+</sup> obtained from a 3-mode analysis.

| Mode                             | PBE<br>harm | PBE<br>anharm | PB86<br>harm | PB86<br>anharm | B3LYP<br>harm | B3LYP<br>anharm | $\omega$ B97X-D<br>harm | $\omega$ B97X-D<br>anharm | $\omega$ B97M-V<br>harm |
|----------------------------------|-------------|---------------|--------------|----------------|---------------|-----------------|-------------------------|---------------------------|-------------------------|
| CH <sub>2</sub> BrI              |             |               |              |                |               |                 |                         |                           |                         |
| 1                                | 0.041       | 0.039         | 0.040        | 0.038          | 0.059         | 0.057           | 0.110                   | 0.108                     | 0.105                   |
| 2                                | 8.984       | 11.510        | 10.473       | 13.226         | 6.547         | 8.337           | 2.372                   | 2.552                     | 2.873                   |
| 3                                | 83.097      | 84.491        | 86.608       | 87.923         | 78.170        | 80.713          | 57.181                  | 60.437                    | 54.843                  |
| 4                                | 5.027       | 4.809         | 4.902        | 4.680          | 4.900         | 4.722           | 5.114                   | 4.956                     | 4.636                   |
| 5                                | 0.021       | 0.071         | 0.017        | 0.034          | 0.009         | 0.024           | 0.005                   | 0.012                     | 0.003                   |
| 6                                | 69.195      | 61.932        | 72.708       | 65.203         | 81.769        | 74.460          | 73.784                  | 58.873                    | 74.952                  |
| 7                                | 0.002       | 0.026         | 0.024        | 0.037          | 0.034         | 0.051           | 0.032                   | 0.035                     | 0.006                   |
| 8                                | 0.367       | 1.102         | 0.435        | 1.282          | 0.409         | 1.202           | 0.478                   | 0.940                     | 0.821                   |
| 9                                | 4.110       | 1.964         | 3.691        | 1.682          | 3.957         | 1.915           | 3.919                   | 2.406                     | 3.249                   |
| CH <sub>2</sub> BrI <sup>+</sup> |             |               |              |                |               |                 |                         |                           |                         |
| 1                                | 0.457       | 0.433         | 0.420        | 0.395          | 0.874         | 0.834           | 1.963                   | 1.860                     | 3.410                   |
| 2                                | 13.617      | 13.988        | 14.279       | 15.330         | 17.277        | 18.359          | 20.046                  | 21.082                    | 25.556                  |
| 3                                | 7.084       | 7.140         | 7.563        | 7.944          | 7.540         | 7.980           | 7.024                   | 7.345                     | 7.240                   |
| 4                                | 2.400       | 2.296         | 2.316        | 2.196          | 2.364         | 2.275           | 2.599                   | 2.643                     | 2.224                   |
| 5                                | 0.023       | 0.003         | 0.020        | 0.041          | 0.021         | 0.018           | 0.017                   | 0.067                     | 0.037                   |
| 6                                | 1.168       | 0.852         | 1.298        | 1.037          | 1.071         | 0.902           | 0.947                   | 0.886                     | 1.044                   |
| 7                                | 0.472       | 0.502         | 0.485        | 0.467          | 0.769         | 0.737           | 0.780                   | 0.844                     | 1.273                   |
| 8                                | 15.139      | 13.982        | 14.298       | 12.129         | 13.878        | 12.050          | 14.524                  | 13.164                    | 13.156                  |
| 9                                | 28.178      | 25.571        | 27.222       | 22.979         | 27.985        | 24.190          | 29.027                  | 25.828                    | 28.327                  |
| CHDBrI                           |             |               |              |                |               |                 |                         |                           |                         |
| 1                                | 0.042       | 0.039         | 0.041        | 0.039          | 0.060         | 0.059           | 0.110                   | 0.109                     | 0.066                   |
| 2                                | 6.855       | 7.705         | 8.020        | 9.483          | 5.078         | 6.063           | 1.865                   | 1.820                     | 1.547                   |
| 3                                | 67.849      | 68.891        | 72.167       | 74.428         | 63.683        | 66.744          | 40.530                  | 41.530                    | 37.709                  |
| 4                                | 2.575       | 2.427         | 2.499        | 2.365          | 2.503         | 2.415           | 2.694                   | 2.510                     | 2.393                   |
| 5                                | 35.292      | 33.735        | 35.548       | 32.982         | 35.912        | 34.211          | 34.834                  | 33.857                    | 35.663                  |
| 6                                | 43.512      | 39.993        | 45.825       | 41.467         | 51.858        | 45.290          | 47.063                  | 39.287                    | 47.343                  |
| 7                                | 1.116       | 0.798         | 1.110        | 0.939          | 1.135         | 1.088           | 1.117                   | 0.781                     | 1.007                   |
| 8                                | 1.044       | 0.936         | 0.981        | 0.950          | 1.031         | 1.074           | 1.048                   | 1.314                     | 1.030                   |
| 9                                | 2.447       | 1.536         | 2.247        | 1.502          | 2.375         | 1.579           | 2.377                   | 1.734                     | 2.125                   |
| CHDBrI <sup>+</sup>              |             |               |              |                |               |                 |                         |                           |                         |
| 1                                | 0.455       | 0.437         | 0.417        | 0.396          | 0.871         | 0.836           | 1.961                   | 1.839                     | 4.373                   |
| 2                                | 11.503      | 12.551        | 12.197       | 13.291         | 15.088        | 16.256          | 17.054                  | 18.310                    | 21.834                  |
| 3                                | 6.143       | 6.557         | 6.598        | 6.952          | 6.680         | 7.007           | 6.079                   | 5.966                     | 6.490                   |
| 4                                | 1.970       | 1.922         | 1.934        | 1.896          | 1.947         | 1.938           | 2.332                   | 2.836                     | 2.284                   |
| 5                                | 1.548       | 1.254         | 1.546        | 1.370          | 1.342         | 1.207           | 1.716                   | 1.485                     | 2.049                   |
| 6                                | 1.034       | 0.811         | 1.149        | 0.856          | 0.955         | 0.762           | 0.795                   | 0.672                     | 0.746                   |
| 7                                | 1.002       | 0.942         | 1.043        | 0.949          | 1.327         | 1.151           | 1.303                   | 1.297                     | 1.790                   |
| 8                                | 8.438       | 7.114         | 7.940        | 6.556          | 7.948         | 6.688           | 8.445                   | 7.412                     | 7.551                   |
| 9                                | 22.438      | 19.055        | 21.539       | 18.010         | 21.754        | 18.461          | 22.602                  | 19.943                    | 20.723                  |



Table S4: Harmonic (harm) and anharmonic (anharm) lifetimes for the fundamental transitions of the molecules CH<sub>2</sub>BrI, CH<sub>2</sub>BrI<sup>+</sup>, CHDBrI, and CHDBrI<sup>+</sup> obtained from a 3-mode analysis.

| Mode                             | PBE<br>harm | PBE<br>anharm | PB86<br>harm | PB86<br>anharm | B3LYP<br>harm | B3LYP<br>anharm | $\omega$ B97X-D<br>harm | $\omega$ B97X-D<br>anharm | $\omega$ B97M-V<br>harm |
|----------------------------------|-------------|---------------|--------------|----------------|---------------|-----------------|-------------------------|---------------------------|-------------------------|
| CH <sub>2</sub> BrI              |             |               |              |                |               |                 |                         |                           |                         |
| 1                                | 2.91 h      | 3.08 h        | 3.03 h       | 3.13 h         | 1.91 h        | 1.9 h           | 56.9 min                | 1.01 h                    | 59.2 min                |
| 2                                | 3.44 s      | 2.78 s        | 3.02 s       | 2.48 s         | 4.6 s         | 3.75 s          | 11.3 s                  | 10.9 s                    | 9.25 s                  |
| 3                                | 268 ms      | 279 ms        | 266 ms       | 277 ms         | 276 ms        | 281 ms          | 318 ms                  | 319 ms                    | 323 ms                  |
| 4                                | 2.91 s      | 3.1 s         | 2.99 s       | 3.18 s         | 2.79 s        | 2.95 s          | 2.6 s                   | 2.74 s                    | 2.87 s                  |
| 5                                | 5.78 min    | 1.77 min      | 7.15 min     | 3.71 min       | 12.5 min      | 4.83 min        | 21.5 min                | 9.55 min                  | 36.2 min                |
| 6                                | 91 ms       | 105 ms        | 86.5 ms      | 99.9 ms        | 70.4 ms       | 79.9 ms         | 75.2 ms                 | 100 ms                    | 75.1 ms                 |
| 7                                | 35.6 min    | 2.9 min       | 2.96 min     | 2.04 min       | 1.93 min      | 1.36 min        | 2 min                   | 1.93 min                  | 10.8 min                |
| 8                                | 2.33 s      | 843 ms        | 1.97 s       | 729 ms         | 1.99 s        | 734 ms          | 1.69 s                  | 972 ms                    | 980 ms                  |
| 9                                | 196 ms      | 452 ms        | 219 ms       | 530 ms         | 195 ms        | 441 ms          | 195 ms                  | 364 ms                    | 235 ms                  |
| CH <sub>2</sub> BrI <sup>+</sup> |             |               |              |                |               |                 |                         |                           |                         |
| 1                                | 15.9 min    | 16.9 min      | 17.7 min     | 17.5 min       | 8.12 min      | 9.69 min        | 2.89 min                | 2.8 min                   | 1.68 min                |
| 2                                | 2.21 s      | 2.35 s        | 2.19 s       | 2.22 s         | 1.78 s        | 1.83 s          | 1.31 s                  | 1.32 s                    | 1.08 s                  |
| 3                                | 3.1 s       | 3.27 s        | 2.99 s       | 2.96 s         | 2.89 s        | 2.89 s          | 2.73 s                  | 2.68 s                    | 2.6 s                   |
| 4                                | 5.28 s      | 5.57 s        | 5.48 s       | 5.85 s         | 5.01 s        | 5.31 s          | 4.39 s                  | 4.42 s                    | 5.15 s                  |
| 5                                | 6.01 min    | 47.9 min      | 6.91 min     | 3.49 min       | 6.09 min      | 7.43 min        | 7.33 min                | 1.88 min                  | 3.4 min                 |
| 6                                | 5.7 s       | 8.13 s        | 5.12 s       | 6.62 s         | 5.74 s        | 7.07 s          | 6.33 s                  | 6.86 s                    | 5.85 s                  |
| 7                                | 9.14 s      | 9.08 s        | 8.87 s       | 9.72 s         | 5.17 s        | 5.71 s          | 5 s                     | 4.86 s                    | 3.1 s                   |
| 8                                | 56.6 ms     | 66.6 ms       | 60.2 ms      | 77 ms          | 58.8 ms       | 73.3 ms         | 55.6 ms                 | 67.4 ms                   | 61.2 ms                 |
| 9                                | 28.3 ms     | 34.1 ms       | 29.4 ms      | 38.1 ms        | 27.2 ms       | 34.4 ms         | 26 ms                   | 32.4 ms                   | 26.6 ms                 |
| CHDBrI                           |             |               |              |                |               |                 |                         |                           |                         |
| 1                                | 2.86 h      | 3.44 h        | 2.97 h       | 3.4 h          | 1.89 h        | 1.93 h          | 57.1 min                | 1.19 h                    | 1.57 h                  |
| 2                                | 4.82 s      | 4.53 s        | 4.21 s       | 3.71 s         | 6.34 s        | 5.53 s          | 15.5 s                  | 16.7 s                    | 17.8 s                  |
| 3                                | 346 ms      | 364 ms        | 336 ms       | 345 ms         | 357 ms        | 360 ms          | 480 ms                  | 503 ms                    | 510 ms                  |
| 4                                | 7.65 s      | 8.37 s        | 7.9 s        | 8.54 s         | 7.38 s        | 7.81 s          | 6.62 s                  | 7.35 s                    | 7.24 s                  |
| 5                                | 362 ms      | 398 ms        | 360 ms       | 404 ms         | 328 ms        | 357 ms          | 320 ms                  | 353 ms                    | 314 ms                  |
| 6                                | 155 ms      | 176 ms        | 147 ms       | 169 ms         | 119 ms        | 141 ms          | 126 ms                  | 163 ms                    | 126 ms                  |
| 7                                | 4.83 s      | 7.15 s        | 4.85 s       | 6.05 s         | 4.38 s        | 4.82 s          | 4.36 s                  | 6.57 s                    | 4.82 s                  |
| 8                                | 1.48 s      | 1.76 s        | 1.58 s       | 1.74 s         | 1.43 s        | 1.46 s          | 1.39 s                  | 1.22 s                    | 1.41 s                  |
| 9                                | 338 ms      | 592 ms        | 370 ms       | 608 ms         | 333 ms        | 547 ms          | 330 ms                  | 516 ms                    | 368 ms                  |
| CHDBrI <sup>+</sup>              |             |               |              |                |               |                 |                         |                           |                         |
| 1                                | 16 min      | 16.5 min      | 17.9 min     | 20.4 min       | 8.17 min      | 9.3 min         | 2.9 min                 | 3.26 min                  | 1.37 min                |
| 2                                | 2.79 s      | 2.75 s        | 2.73 s       | 2.71 s         | 2.16 s        | 2.16 s          | 1.65 s                  | 1.63 s                    | 1.33 s                  |
| 3                                | 3.84 s      | 3.74 s        | 3.67 s       | 3.66 s         | 3.49 s        | 3.48 s          | 3.41 s                  | 3.63 s                    | 3.21 s                  |
| 4                                | 8.93 s      | 9.3 s         | 9.12 s       | 9.57 s         | 8.46 s        | 8.67 s          | 6.73 s                  | 5.71 s                    | 6.94 s                  |
| 5                                | 9.04 s      | 11.5 s        | 9.07 s       | 10.7 s         | 9.7 s         | 11.2 s          | 7.33 s                  | 8.68 s                    | 6.15 s                  |
| 6                                | 7.05 s      | 9.29 s        | 6.33 s       | 8.86 s         | 7.04 s        | 9.11 s          | 8.24 s                  | 9.99 s                    | 8.79 s                  |
| 7                                | 5.39 s      | 6.01 s        | 5.17 s       | 5.99 s         | 3.76 s        | 4.57 s          | 3.75 s                  | 3.96 s                    | 2.75 s                  |
| 8                                | 182 ms      | 230 ms        | 194 ms       | 251 ms         | 184 ms        | 233 ms          | 172 ms                  | 211 ms                    | 191 ms                  |
| 9                                | 36.7 ms     | 47.2 ms       | 38.4 ms      | 50.2 ms        | 36.1 ms       | 46.3 ms         | 34.4 ms                 | 43.2 ms                   | 37.3 ms                 |

Table S5: Overtone ( $0 \rightarrow 2$ ) anharmonic frequencies (in  $\text{cm}^{-1}$ ) and corresponding intensities (in  $\text{km/mol}$ ) for the molecules  $\text{CH}_2\text{BrI}$ ,  $\text{CH}_2\text{BrI}^+$ ,  $\text{CHDBrI}$ , and  $\text{CHDBrI}^+$  obtained from a 3-mode analysis.

| Mode                      | PBE<br>freq | PBE<br>int | PB86<br>freq | PB86<br>int | B3LYP<br>freq | B3LYP<br>int | $\omega\text{B97X-D}$<br>freq | $\omega\text{B97X-D}$<br>int |
|---------------------------|-------------|------------|--------------|-------------|---------------|--------------|-------------------------------|------------------------------|
| $\text{CH}_2\text{BrI}$   |             |            |              |             |               |              |                               |                              |
| 1                         | 271.8       | 0.001      | 273.0        | 0.000       | 286.4         | 0.000        | 285.9                         | 0.001                        |
| 2                         | 992.1       | 0.193      | 979.1        | 0.224       | 1004.4        | 0.133        | 1065.5                        | 0.055                        |
| 3                         | 1154.7      | 0.404      | 1135.6       | 0.420       | 1178.0        | 0.355        | 1278.3                        | 0.177                        |
| 4                         | 1464.8      | 0.010      | 1464.5       | 0.008       | 1515.6        | 0.010        | 1537.5                        | 0.013                        |
| 5                         | 2055.9      | 0.102      | 2051.3       | 0.092       | 2139.9        | 0.072        | 2148.8                        | 0.081                        |
| 6                         | 2207.1      | 0.766      | 2208.9       | 0.763       | 2311.7        | 0.645        | 2314.8                        | 0.545                        |
| 7                         | 2643.8      | 0.000      | 2644.2       | 0.000       | 2757.1        | 0.005        | 2790.8                        | 0.014                        |
| 8                         | 5809.8      | 0.616      | 5790.4       | 0.604       | 5962.1        | 0.556        | 5827.6                        | 0.446                        |
| 9                         | 5934.9      | 1.219      | 5918.4       | 1.221       | 6085.8        | 1.176        | 5944.0                        | 0.968                        |
| $\text{CH}_2\text{BrI}^+$ |             |            |              |             |               |              |                               |                              |
| 1                         | 269.6       | 0.001      | 277.1        | 0.001       | 256.5         | 0.001        | 318.7                         | 0.003                        |
| 2                         | 974.3       | 0.010      | 958.7        | 0.007       | 963.9         | 0.011        | 1061.8                        | 0.033                        |
| 3                         | 1162.0      | 0.042      | 1158.7       | 0.045       | 1170.9        | 0.065        | 1268.7                        | 0.068                        |
| 4                         | 1583.6      | 0.027      | 1578.0       | 0.027       | 1628.2        | 0.033        | 1651.2                        | 0.037                        |
| 5                         | 1922.3      | 0.115      | 1927.1       | 0.104       | 1991.3        | 0.086        | 2057.5                        | 0.106                        |
| 6                         | 2143.3      | 0.996      | 2152.3       | 1.003       | 2234.0        | 0.879        | 2290.2                        | 0.830                        |
| 7                         | 2635.9      | 0.140      | 2641.2       | 0.144       | 2741.6        | 0.140        | 2777.5                        | 0.139                        |
| 8                         | 5806.2      | 0.671      | 5794.1       | 0.665       | 5961.6        | 0.591        | 5927.2                        | 0.492                        |
| 9                         | 5990.1      | 1.111      | 5974.5       | 1.114       | 6137.9        | 1.032        | 6094.8                        | 0.870                        |
| $\text{CHDBrI}$           |             |            |              |             |               |              |                               |                              |
| 1                         | 258.0       | 0.001      | 258.7        | 0.000       | 279.5         | 0.000        | 261.7                         | 0.000                        |
| 2                         | 950.6       | 0.134      | 946.5        | 0.165       | 970.9         | 0.107        | 1023.0                        | 0.038                        |
| 3                         | 1120.6      | 0.420      | 1107.4       | 0.520       | 1145.7        | 0.458        | 1227.5                        | 0.235                        |
| 4                         | 1254.7      | 0.169      | 1258.3       | 0.177       | 1302.7        | 0.212        | 1317.5                        | 0.177                        |
| 5                         | 1535.4      | 0.182      | 1541.3       | 0.174       | 1612.0        | 0.141        | 1623.7                        | 0.133                        |
| 6                         | 2115.6      | 0.616      | 2123.4       | 0.590       | 2221.2        | 0.405        | 2211.2                        | 0.096                        |
| 7                         | 2357.1      | 0.252      | 2361.8       | 0.240       | 2460.2        | 0.229        | 2485.3                        | 0.234                        |
| 8                         | 4339.3      | 0.635      | 4328.8       | 0.628       | 4454.6        | 0.603        | 4363.9                        | 0.498                        |
| 9                         | 5809.7      | 1.569      | 5791.4       | 1.558       | 5964.1        | 1.496        | 5799.0                        | 1.213                        |
| $\text{CHDBrI}^+$         |             |            |              |             |               |              |                               |                              |
| 1                         | 271.8       | 0.001      | 256.3        | 0.001       | 261.7         | 0.000        | 296.9                         | 0.003                        |
| 2                         | 952.1       | 0.010      | 931.0        | 0.005       | 942.6         | 0.005        | 1026.5                        | 0.025                        |
| 3                         | 1134.9      | 0.045      | 1114.1       | 0.046       | 1137.6        | 0.066        | 1210.0                        | 0.068                        |
| 4                         | 1337.1      | 0.126      | 1326.7       | 0.127       | 1378.8        | 0.137        | 1399.7                        | 0.126                        |
| 5                         | 1484.0      | 0.181      | 1470.8       | 0.173       | 1532.7        | 0.155        | 1571.2                        | 0.165                        |
| 6                         | 2051.3      | 1.003      | 2044.0       | 0.984       | 2137.4        | 0.889        | 2173.7                        | 0.896                        |
| 7                         | 2367.1      | 0.732      | 2362.2       | 0.702       | 2456.9        | 0.670        | 2483.3                        | 0.680                        |
| 8                         | 4362.1      | 0.529      | 4346.8       | 0.525       | 4471.9        | 0.480        | 4445.4                        | 0.402                        |
| 9                         | 5849.8      | 1.368      | 5829.8       | 1.366       | 6000.1        | 1.250        | 5938.9                        | 1.036                        |

Table S6: Comparison of effects of the DFT functional, basis set, optimization point group and open-shell formalism on vibrational harmonic transition frequencies (in  $\text{cm}^{-1}$ ) for  $\text{CHDBrI}^+$ .

| Mode | $\omega\text{B97X-D}$ |        |        |        |             |        |        |        | MN15      |        |             |        |
|------|-----------------------|--------|--------|--------|-------------|--------|--------|--------|-----------|--------|-------------|--------|
|      | Def2-TZVP             |        |        |        | Def2-QZVPPD |        |        |        | Def2-TZVP |        | Def2-QZVPPD |        |
|      | $C_s$                 |        | $C_1$  |        | $C_s$       |        | $C_1$  |        | $C_s$     |        | $C_s$       |        |
|      | ROKS                  | UKS    | ROKS   | UKS    | ROKS        | UKS    | ROKS   | UKS    | ROKS      | UKS    | ROKS        | UKS    |
| 1    | 151.4                 | 151.7  | 151.3  | 151.6  | 152.7       | 153.2  | 152.6  | 153.1  | 151.6     | 150.9  | 151.9       | 151.2  |
| 2    | 534.0                 | 531.7  | 534.2  | 531.7  | 534.6       | 532.3  | 534.9  | 532.4  | 519.9     | 517.2  | 520.6       | 518.1  |
| 3    | 622.0                 | 620.5  | 622.1  | 620.7  | 622.2       | 620.7  | 622.1  | 620.7  | 619.9     | 618.7  | 621.3       | 620.1  |
| 4    | 712.6                 | 712.1  | 712.2  | 711.9  | 714.8       | 713.9  | 713.9  | 713.4  | 699.0     | 698.5  | 699.0       | 698.2  |
| 5    | 797.5                 | 797.1  | 797.4  | 797.0  | 797.5       | 797.1  | 797.6  | 797.0  | 788.9     | 788.7  | 787.5       | 787.3  |
| 6    | 1105.1                | 1105.0 | 1105.1 | 1105.0 | 1104.9      | 1104.7 | 1105.1 | 1104.6 | 1090.9    | 1091.2 | 1088.5      | 1088.5 |
| 7    | 1276.5                | 1276.2 | 1276.4 | 1276.1 | 1279.3      | 1279.0 | 1279.0 | 1278.8 | 1261.9    | 1261.6 | 1260.9      | 1260.6 |
| 8    | 2350.7                | 2350.8 | 2351.0 | 2351.1 | 2348.5      | 2348.4 | 2348.6 | 2348.6 | 2369.3    | 2369.3 | 2364.3      | 2364.3 |
| 9    | 3209.1                | 3209.3 | 3210.7 | 3210.8 | 3205.9      | 3205.9 | 3206.9 | 3206.9 | 3235.0    | 3235.0 | 3227.7      | 3227.6 |

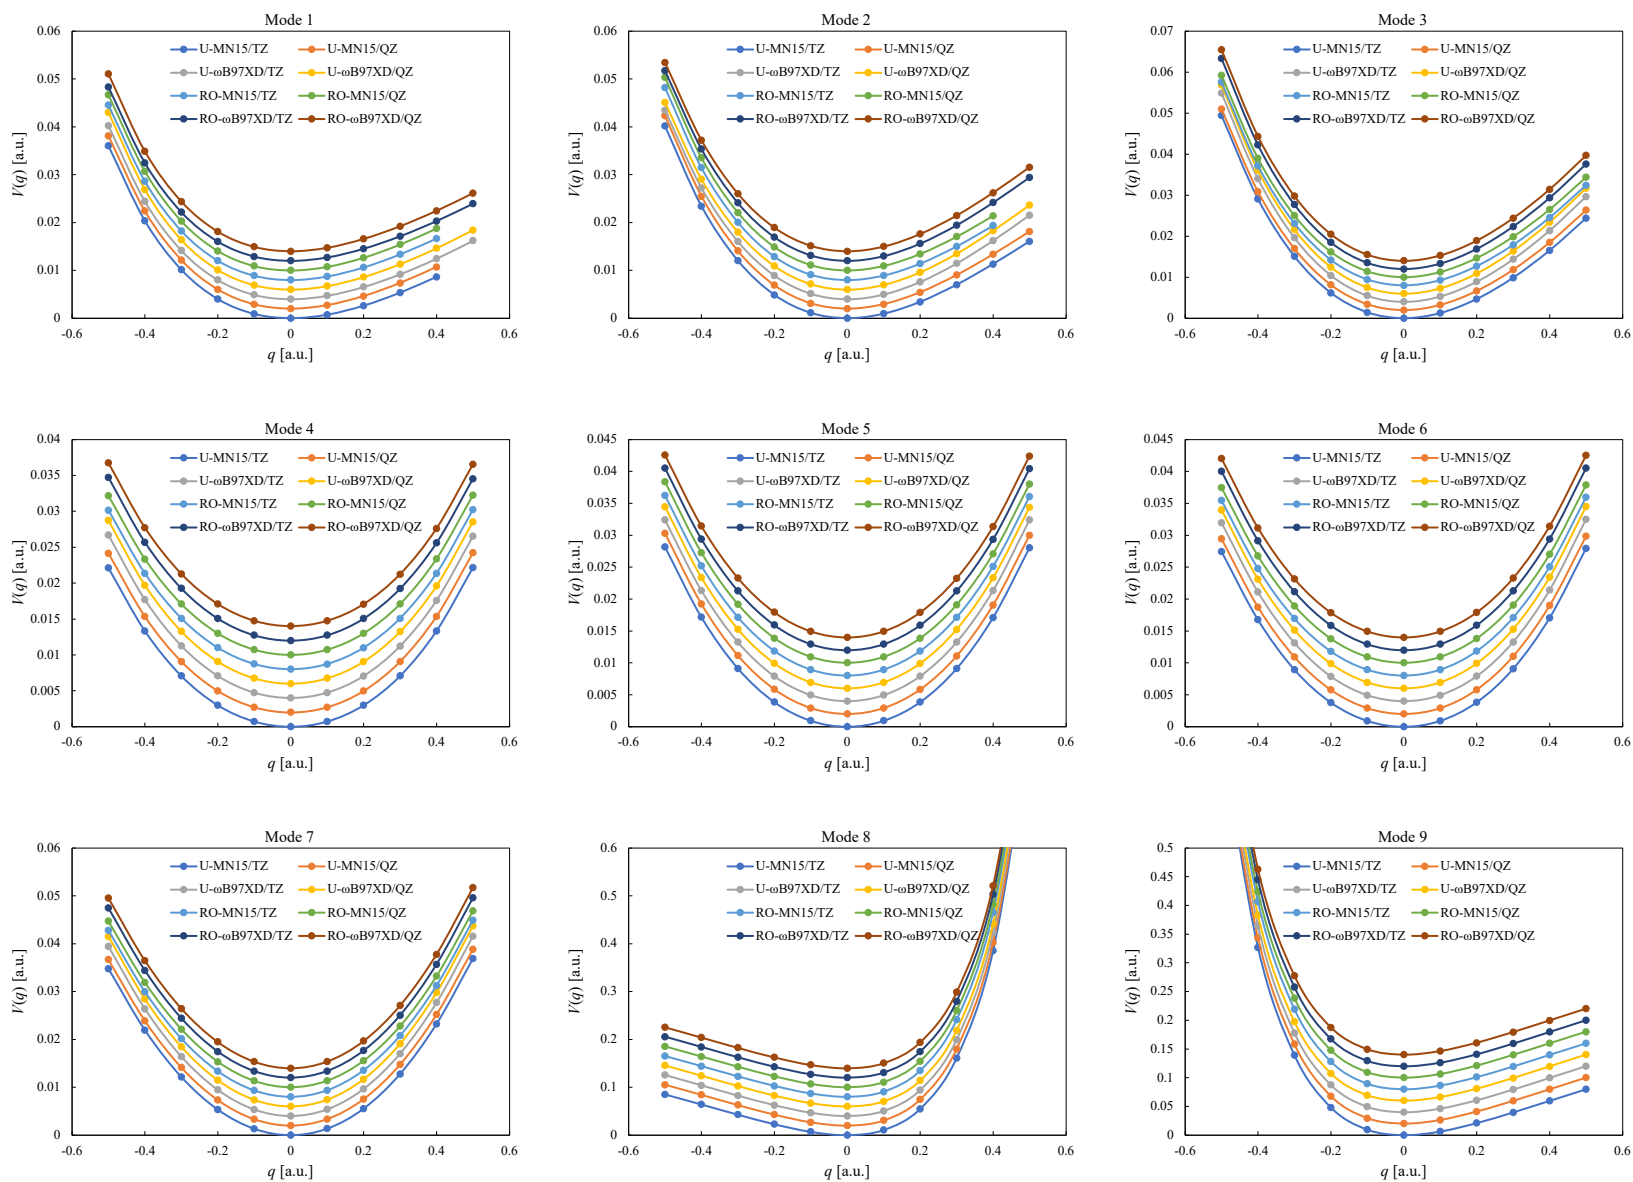

Figure S1: Comparison of effects of the DFT functional, basis set, and open-shell formalism on potential curves  $V(q)$  along vibrational modes of  $\text{CHDBrI}^+$ . For visual clarity, the potential curves are vertically shifted using an equidistant step of 0.002 and 0.02 a.u. for modes 1–7 and 8–9, respectively.

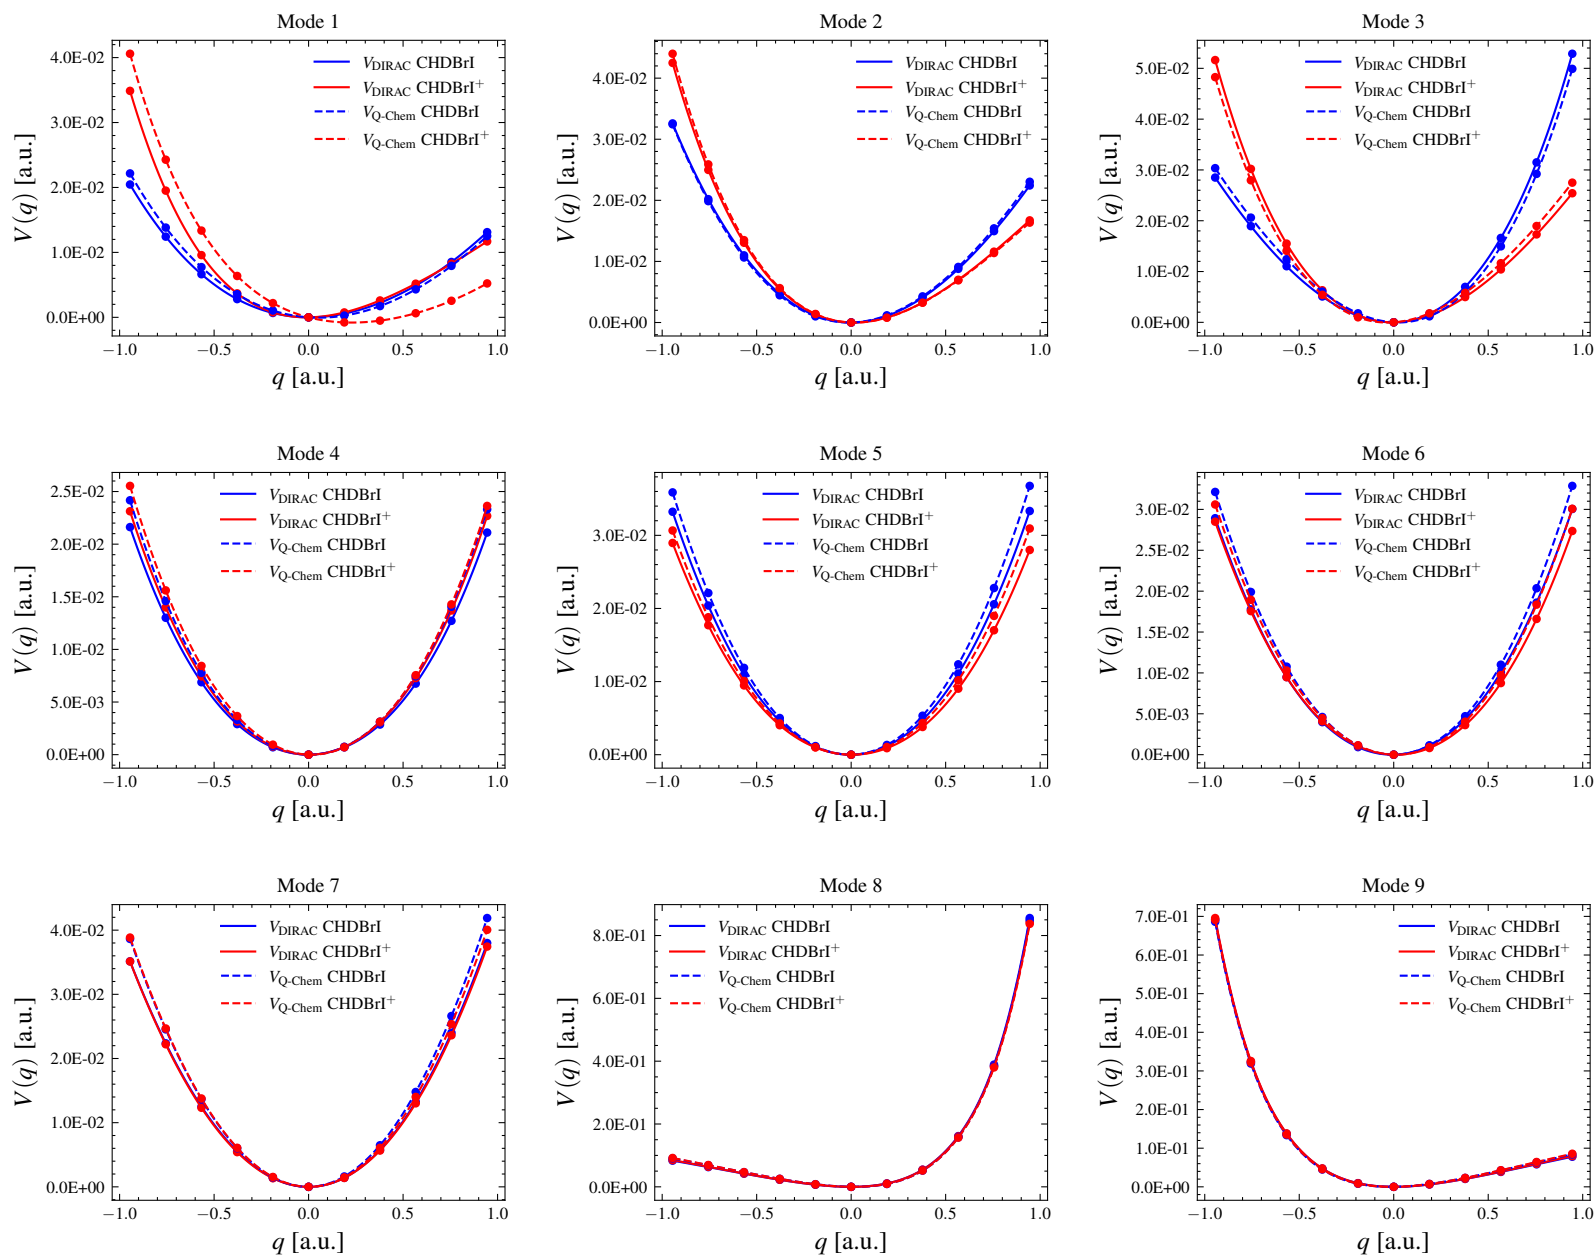

Figure S2: Comparison of potential curves  $V(q)$  obtained from DIRAC and Q-Chem calculations (as described in Section S1). In both cases, the displacements  $q$  are based on the Q-Chem harmonic analysis.

## S4. Dependence of the PV energy shift on the level of theory

The CH wagging mode (mode 6) in CHDBrI<sup>+</sup> turns out to be a very promising candidate for future high-precision spectroscopy experiments. Therefore, to ensure the reliability of our theoretical prediction for the magnitude of the PV frequency shift  $\Delta\nu^{\text{PV}}$  for this mode, we tested the effect of the basis set applied, our computational approach (HF vs. DFT), and the choice of the functional used on our results. From Table S7, we can see that using a smaller basis set (Def2-TZVP) has only a minor effect on the PV frequency difference. Hybrid DFT functionals sit at the intersection of the delocalized LDA and localized HF. By comparing our results to these extremes, we can easily set very conservative bounds on the result without the need to test an entire spectrum of DFT functionals. HF and LDA yield significantly different values. However, the PV frequency shift is still in the ballpark of 1 Hz, which gives confidence for our method used, even in the case when HF was used also for the optimization step. The result can thus be considered fairly robust. We have thoroughly tested the dependence of the result on the parameters of the methodology in our previous work<sup>24</sup> with a similar conclusion.

Table S7: Calculated PV frequency shift  $\Delta\nu^{\text{PV}}$  (in Hz) for vibrational mode 6 of (R)-CHDBrI<sup>+</sup> on different levels of theory (method or functional / basis set). Reference method and result shown in bold.

| Geometry optimization                | DIRAC calculations             | $\Delta\nu^{\text{PV}}$ |
|--------------------------------------|--------------------------------|-------------------------|
| $\omega$ <b>B97M-V / Def2-QZVPPD</b> | <b>CAM-B3LYP* / Dyall.av4z</b> | <b>-1.78</b>            |
| $\omega$ B97M-V / Def2-TZVP          | CAM-B3LYP* / Dyall.v3z         | -1.72                   |
| $\omega$ B97M-V / Def2-QZVPPD        | HF / Dyall.av4z                | -1.37                   |
| $\omega$ B97M-V / Def2-QZVPPD        | LDA / Dyall.av4z               | -0.86                   |
| HF / Def2-QZVPPD                     | HF / Dyall.av4z                | -0.86                   |

## S5. Vibrational PV Shift Analysis

Table S8 shows the results of the VPT analysis of the PV energies for all modes. Mode 6 was discussed in the main text. Similarly, modes 5 and 7 are dominated by the harmonic VPT term in Eq. (S2). In contrast, modes 8 and 9 corresponding to the H/D stretching, which are strongly anharmonic, are dominated by the anharmonic VPT term in Eq. (S2).

Figure S3 summarizes potential energy  $V(q)$  and PV  $E^{PV}(q)$  curves for all modes of both molecules. This visually supports the VPT analysis in Table S8. For the sake of reproducibility, in Table S8 we provide all calculated datapoints as well as fitting coefficients of the curves shown in the plots in Figure S3.

Table S8: PV value for Numerov–Cooley (NC) procedure and VPT (vibrational perturbation theory) values  $\Delta\nu^{PV}$  (in Hz) for (R)-CHDBrI<sup>+</sup>. Curvature and anharmonic VPT contributions of from Eq. (S2) are shown separately.

| Mode number | CHDBrI  |         |           |             | CHDBrI <sup>+</sup> |         |           |             |
|-------------|---------|---------|-----------|-------------|---------------------|---------|-----------|-------------|
|             | NC      | VPT     | VPT curv. | VPT anharm. | NC                  | VPT     | VPT curv. | VPT anharm. |
| 1           | -0.0010 | -0.0010 | -0.0006   | 0.0004      | 0.0088              | 0.0088  | 0.0054    | -0.0035     |
| 2           | -0.0442 | -0.0423 | -0.0346   | 0.0078      | -0.1256             | -0.1145 | -0.0373   | 0.0772      |
| 3           | 0.2419  | 0.2347  | 0.0860    | -0.1487     | -0.0367             | -0.0457 | 0.2489    | 0.2946      |
| 4           | -0.0509 | -0.0523 | -0.0567   | -0.0044     | -0.0415             | -0.0769 | -0.0321   | 0.0448      |
| 5           | -0.0614 | -0.0649 | -0.0490   | 0.0159      | 1.3352              | 1.3452  | 1.3264    | -0.0188     |
| 6           | 0.0534  | 0.0292  | 0.0493    | 0.0200      | -1.7789             | -1.8421 | -1.8405   | 0.0016      |
| 7           | 0.0428  | 0.0535  | 0.0203    | -0.0332     | -0.5901             | -0.6102 | -0.5573   | 0.0529      |
| 8           | 0.0177  | 0.0194  | 0.0155    | -0.0039     | 0.9370              | 0.8541  | 0.2086    | -0.6454     |
| 9           | -0.0549 | -0.0555 | -0.0022   | 0.0533      | -1.2918             | -1.1562 | -0.2159   | 0.9403      |

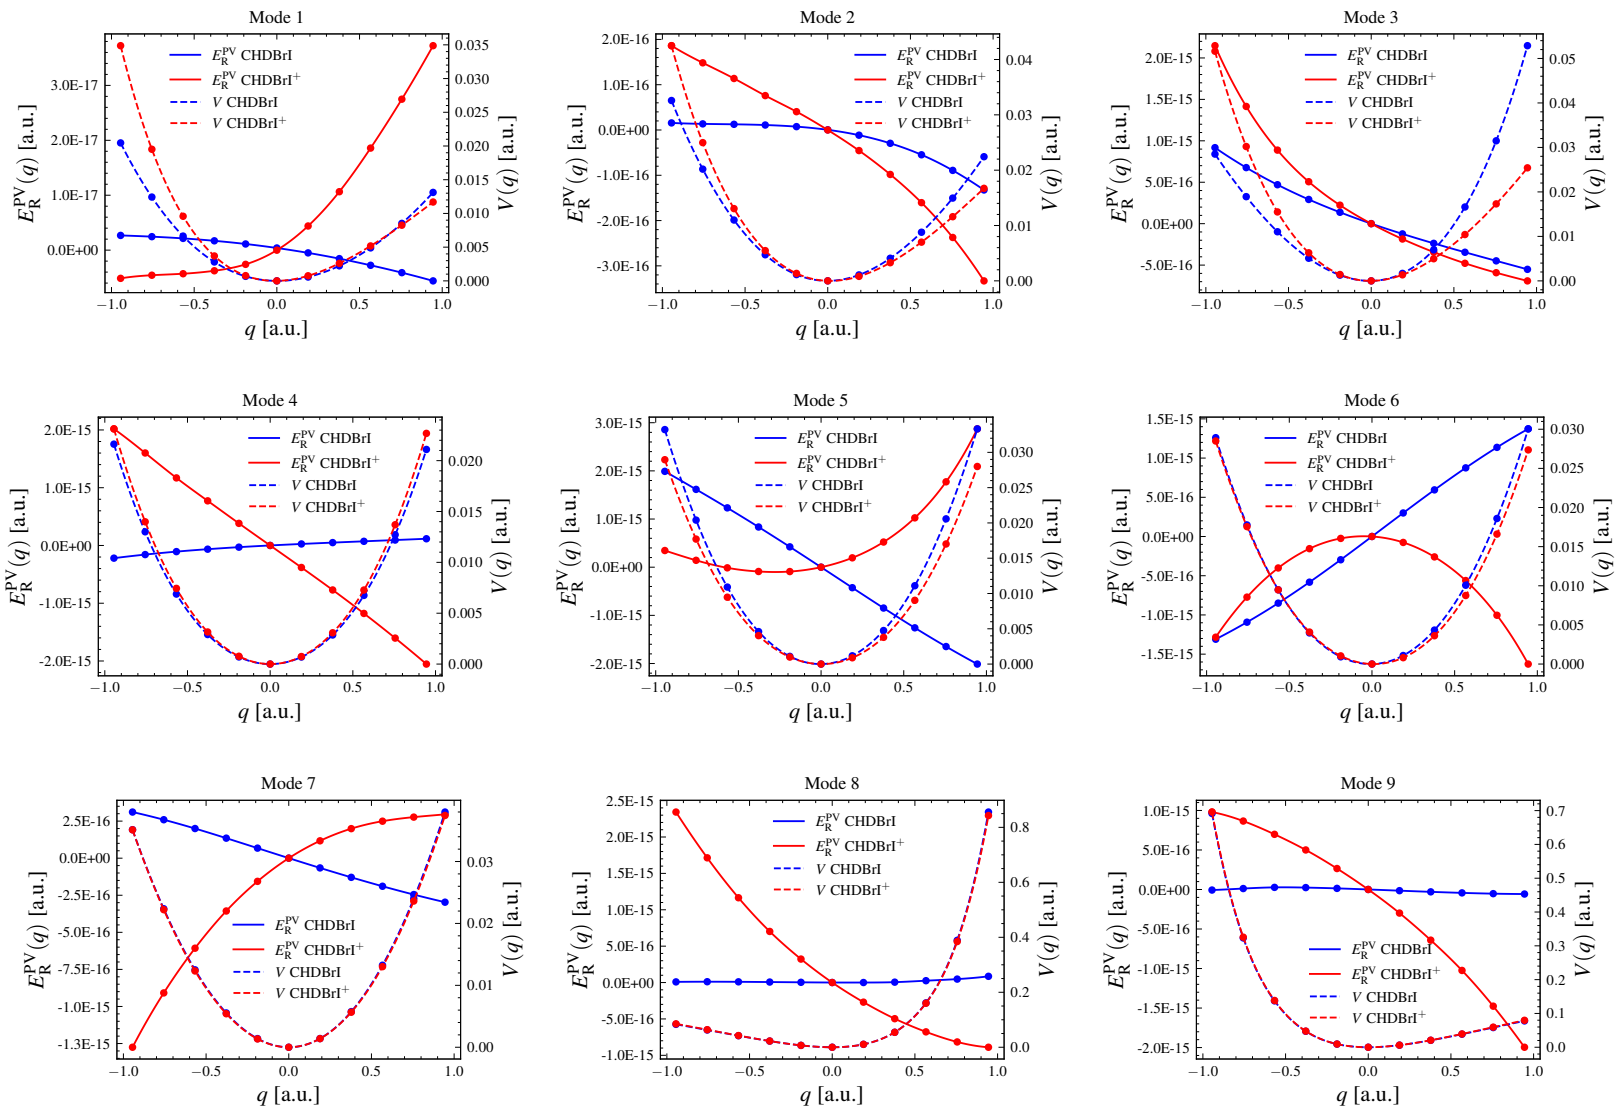

Figure S3: Comparison between (R)-CHDBrI and (R)-CHDBrI<sup>+</sup> for the potential energy  $V(q)$  and PV  $E_R^{PV}(q)$  curves.



Table S9: Raw data of the potential energy  $V(q)$  and PV  $E^{\text{PV}}(q)$  for (R)-CHDBrI and (R)-CHDBrI<sup>+</sup>, including polynomial fitting coefficients ( $C_N$ ) for  $f(x) = \sum^N C_N x^N$ . All energy values for  $V(q)$  and  $E^{\text{PV}}(q)$  are expressed in a.u..

| Mode 1               |            |                     |            |                    | Mode 2          |            |                     |            |                    |
|----------------------|------------|---------------------|------------|--------------------|-----------------|------------|---------------------|------------|--------------------|
| CHDBrI               |            | CHDBrI <sup>+</sup> |            |                    | CHDBrI          |            | CHDBrI <sup>+</sup> |            |                    |
| $q[\text{\AA}]$      | $V(q)$     | $E^{\text{PV}}(q)$  | $V(q)$     | $E^{\text{PV}}(q)$ | $q[\text{\AA}]$ | $V(q)$     | $E^{\text{PV}}(q)$  | $V(q)$     | $E^{\text{PV}}(q)$ |
| -0.5                 | 2.046E-02  | 2.679E-18           | 3.488E-02  | -5.138E-18         | -0.5            | 3.259E-02  | 1.563E-17           | 4.250E-02  | 1.862E-16          |
| -0.4                 | 1.243E-02  | 2.454E-18           | 1.951E-02  | -4.568E-18         | -0.4            | 2.019E-02  | 1.351E-17           | 2.498E-02  | 1.483E-16          |
| -0.3                 | 6.639E-03  | 2.138E-18           | 9.580E-03  | -4.296E-18         | -0.3            | 1.099E-02  | 1.255E-17           | 1.306E-02  | 1.137E-16          |
| -0.2                 | 2.806E-03  | 1.699E-18           | 3.691E-03  | -3.758E-18         | -0.2            | 4.715E-03  | 1.098E-17           | 5.462E-03  | 7.593E-17          |
| -0.1                 | 6.730E-04  | 1.121E-18           | 7.750E-04  | -2.588E-18         | -0.1            | 1.129E-03  | 7.410E-18           | 1.346E-03  | 4.044E-17          |
| 0                    | 0          | 3.905E-19           | 0          | -9.433E-21         | 0               | 0          | 3.905E-19           | 0          | -9.433E-21         |
| 0.1                  | 5.690E-04  | -4.998E-19          | 7.550E-04  | 4.397E-18          | 0.1             | 1.072E-03  | -1.146E-17          | 8.120E-04  | -4.544E-17         |
| 0.2                  | 2.226E-03  | -1.549E-18          | 2.598E-03  | 1.064E-17          | 0.2             | 4.082E-03  | -2.940E-17          | 3.279E-03  | -9.818E-17         |
| 0.3                  | 4.891E-03  | -2.760E-18          | 5.181E-03  | 1.858E-17          | 0.3             | 8.783E-03  | -5.474E-17          | 6.995E-03  | -1.604E-16         |
| 0.4                  | 8.524E-03  | -4.101E-18          | 8.255E-03  | 2.749E-17          | 0.4             | 1.496E-02  | -8.922E-17          | 1.159E-02  | -2.373E-16         |
| 0.5                  | 1.312E-02  | -5.600E-18          | 1.169E-02  | 3.723E-17          | 0.5             | 2.243E-02  | -1.324E-16          | 1.672E-02  | -3.332E-16         |
| Fitting Coefficients |            |                     |            |                    |                 |            |                     |            |                    |
| $C_6$                | -2.550E-04 | -8.075E-20          | 3.140E-04  | 3.946E-18          | $C_6$           | 3.705E-04  | 5.063E-18           | 5.480E-04  | -5.102E-18         |
| $C_5$                | 2.700E-04  | -5.670E-20          | -1.365E-03 | -1.718E-18         | $C_5$           | 2.395E-04  | 1.618E-18           | -1.223E-03 | -6.528E-18         |
| $C_4$                | 1.830E-03  | 2.858E-19           | 5.073E-03  | -1.226E-17         | $C_4$           | -3.591E-04 | -4.297E-18          | 2.795E-03  | -8.153E-18         |
| $C_3$                | -4.439E-03 | -4.821E-20          | -1.302E-02 | 6.157E-18          | $C_3$           | -6.299E-03 | -3.501E-17          | -1.307E-02 | -5.099E-17         |
| $C_2$                | 1.738E-02  | -2.265E-18          | 2.130E-02  | 2.578E-17          | $C_2$           | 3.084E-02  | -6.601E-17          | 3.024E-02  | -7.087E-17         |
| $C_1$                | -1.370E-04 | -4.293E-18          | 4.380E-04  | 1.829E-17          | $C_1$           | 5.718E-05  | -4.840E-17          | -9.980E-04 | -2.241E-16         |
| $C_0$                | -1.000E-06 | 3.913E-19           | -2.000E-06 | -3.696E-21         | $C_0$           | -4.586E-07 | 3.437E-19           | -4.000E-06 | -1.558E-19         |
| Mode 3               |            |                     |            |                    | Mode 4          |            |                     |            |                    |
| CHDBrI               |            | CHDBrI <sup>+</sup> |            |                    | CHDBrI          |            | CHDBrI <sup>+</sup> |            |                    |
| $q[\text{\AA}]$      | $V(q)$     | $E^{\text{PV}}(q)$  | $V(q)$     | $E^{\text{PV}}(q)$ | $q[\text{\AA}]$ | $V(q)$     | $E^{\text{PV}}(q)$  | $V(q)$     | $E^{\text{PV}}(q)$ |
| -0.5                 | 2.850E-02  | 9.173E-16           | 5.163E-02  | 2.148E-15          | -0.5            | 2.162E-02  | -2.197E-16          | 2.312E-02  | 2.019E-15          |
| -0.4                 | 1.893E-02  | 6.766E-16           | 3.020E-02  | 1.415E-15          | -0.4            | 1.301E-02  | -1.578E-16          | 1.399E-02  | 1.601E-15          |
| -0.3                 | 1.105E-02  | 4.700E-16           | 1.550E-02  | 8.877E-16          | -0.3            | 6.881E-03  | -1.065E-16          | 7.440E-03  | 1.170E-15          |
| -0.2                 | 5.087E-03  | 2.922E-16           | 6.315E-03  | 5.063E-16          | -0.2            | 2.903E-03  | -6.439E-17          | 3.154E-03  | 7.727E-16          |
| -0.1                 | 1.297E-03  | 1.375E-16           | 1.431E-03  | 2.232E-16          | -0.1            | 7.010E-04  | -2.925E-17          | 7.680E-04  | 3.827E-16          |
| 0                    | 0          | 3.905E-19           | 0          | -9.433E-21         | 0               | 0          | 3.905E-19           | 0          | -9.433E-21         |
| 0.1                  | 1.683E-03  | -1.233E-16          | 1.360E-03  | -1.852E-16         | 0.1             | 6.930E-04  | 2.618E-17           | 7.400E-04  | -3.810E-16         |
| 0.2                  | 6.976E-03  | -2.374E-16          | 4.979E-03  | -3.430E-16         | 0.2             | 2.860E-03  | 4.962E-17           | 3.078E-03  | -7.704E-16         |
| 0.3                  | 1.661E-02  | -3.449E-16          | 1.042E-02  | -4.781E-16         | 0.3             | 6.751E-03  | 7.193E-17           | 7.278E-03  | -1.177E-15         |
| 0.4                  | 3.149E-02  | -4.487E-16          | 1.731E-02  | -5.918E-16         | 0.4             | 1.272E-02  | 9.390E-17           | 1.370E-02  | -1.604E-15         |
| 0.5                  | 5.287E-02  | -5.512E-16          | 2.541E-02  | -6.905E-16         | 0.5             | 2.110E-02  | 1.162E-16           | 2.268E-02  | -2.053E-15         |
| Fitting Coefficients |            |                     |            |                    |                 |            |                     |            |                    |
| $C_6$                | 1.460E-04  | -5.950E-18          | -5.200E-05 | -6.046E-17         | $C_6$           | -1.373E-03 | 5.221E-19           | -1.570E-03 | -9.805E-17         |
| $C_5$                | 8.600E-04  | -2.390E-20          | -1.223E-03 | -9.414E-17         | $C_5$           | 6.723E-05  | -2.050E-18          | 1.117E-04  | 8.816E-17          |
| $C_4$                | 4.285E-03  | 2.692E-17           | 4.993E-03  | 3.873E-16          | $C_4$           | 6.427E-03  | -6.421E-18          | 6.732E-03  | 9.847E-17          |
| $C_3$                | 1.297E-02  | -1.020E-16          | -1.490E-02 | -4.064E-16         | $C_3$           | -3.607E-04 | 3.813E-17           | -2.938E-04 | -2.471E-16         |
| $C_2$                | 4.163E-02  | 1.853E-16           | 3.873E-02  | 5.188E-16          | $C_2$           | 1.928E-02  | -5.303E-17          | 2.090E-02  | -3.091E-17         |
| $C_1$                | 6.270E-04  | -6.860E-16          | 3.980E-04  | -1.064E-15         | $C_1$           | -6.655E-06 | 1.454E-16           | -6.128E-05 | -2.005E-15         |
| $C_0$                | -2.000E-06 | 4.099E-19           | 6.000E-06  | -5.511E-20         | $C_0$           | 2.797E-07  | 3.639E-19           | -5.586E-07 | 1.708E-18          |

| Mode 5               |            |                    |                     |                    | Mode 6          |            |                    |                     |                    |
|----------------------|------------|--------------------|---------------------|--------------------|-----------------|------------|--------------------|---------------------|--------------------|
| CHDBrI               |            |                    | CHDBrI <sup>+</sup> |                    | CHDBrI          |            |                    | CHDBrI <sup>+</sup> |                    |
| $q[\text{\AA}]$      | $V(q)$     | $E^{\text{PV}}(q)$ | $V(q)$              | $E^{\text{PV}}(q)$ | $q[\text{\AA}]$ | $V(q)$     | $E^{\text{PV}}(q)$ | $V(q)$              | $E^{\text{PV}}(q)$ |
| -0.5                 | 3.323E-02  | 1.990E-15          | 2.896E-02           | 3.461E-16          | -0.5            | 2.892E-02  | -1.310E-15         | 2.850E-02           | -1.284E-15         |
| -0.4                 | 2.040E-02  | 1.616E-15          | 1.771E-02           | 1.427E-16          | -0.4            | 1.777E-02  | -1.093E-15         | 1.756E-02           | -7.730E-16         |
| -0.3                 | 1.091E-02  | 1.232E-15          | 9.474E-03           | -1.316E-17         | -0.3            | 9.490E-03  | -8.495E-16         | 9.477E-03           | -4.013E-16         |
| -0.2                 | 4.600E-03  | 8.344E-16          | 4.030E-03           | -8.934E-17         | -0.2            | 3.978E-03  | -5.823E-16         | 4.086E-03           | -1.550E-16         |
| -0.1                 | 1.090E-03  | 4.225E-16          | 9.930E-04           | -9.052E-17         | -0.1            | 9.220E-04  | -2.965E-16         | 1.042E-03           | -2.426E-17         |
| 0                    | 0          | 3.905E-19          | 0                   | -9.433E-21         | 0               | 0          | 3.905E-19          | 0                   | -9.433E-21         |
| 0.1                  | 1.171E-03  | -4.258E-16         | 8.910E-04           | 1.945E-16          | 0.1             | 1.091E-03  | 3.002E-16          | 8.130E-04           | -7.562E-17         |
| 0.2                  | 4.751E-03  | -8.483E-16         | 3.789E-03           | 5.223E-16          | 0.2             | 4.339E-03  | 5.946E-16          | 3.617E-03           | -2.601E-16         |
| 0.3                  | 1.110E-02  | -1.259E-15         | 9.033E-03           | 1.024E-15          | 0.3             | 1.007E-02  | 8.753E-16          | 8.758E-03           | -5.616E-16         |
| 0.4                  | 2.058E-02  | -1.648E-15         | 1.702E-02           | 1.773E-15          | 0.4             | 1.860E-02  | 1.137E-15          | 1.660E-02           | -1.004E-15         |
| 0.5                  | 3.333E-02  | -2.011E-15         | 2.800E-02           | 2.872E-15          | 0.5             | 3.005E-02  | 1.372E-15          | 2.736E-02           | -1.627E-15         |
| Fitting Coefficients |            |                    |                     |                    |                 |            |                    |                     |                    |
| $C_6$                | -3.714E-03 | -3.929E-18         | -3.034E-03          | -1.258E-18         | $C_6$           | -3.323E-03 | -6.636E-18         | -3.243E-03          | -3.644E-18         |
| $C_5$                | -1.100E-05 | -3.787E-17         | 2.230E-04           | 2.304E-16          | $C_5$           | -2.900E-05 | 2.757E-17          | 1.690E-04           | -7.101E-17         |
| $C_4$                | 9.826E-03  | 5.709E-17          | 9.126E-03           | 3.972E-16          | $C_4$           | 8.587E-03  | 4.563E-19          | 9.046E-03           | -2.251E-16         |
| $C_3$                | -1.820E-04 | 1.843E-16          | -4.810E-04          | 4.624E-16          | $C_3$           | 1.880E-04  | -2.120E-16         | -1.490E-04          | 1.600E-17          |
| $C_2$                | 3.147E-02  | -6.037E-17         | 2.617E-02           | 1.449E-15          | $C_2$           | 2.801E-02  | 3.957E-17          | 2.580E-02           | -1.427E-15         |
| $C_1$                | 2.250E-04  | -2.252E-15         | -2.560E-04          | 7.401E-16          | $C_1$           | 4.500E-04  | 1.587E-15          | -6.040E-04          | -1.390E-16         |
| $C_0$                | -5.000E-06 | 4.561E-19          | -3.000E-06          | 1.828E-19          | $C_0$           | -4.000E-06 | 4.416E-19          | -4.000E-06          | 8.176E-19          |
| Mode 7               |            |                    |                     |                    | Mode 8          |            |                    |                     |                    |
| CHDBrI               |            |                    | CHDBrI <sup>+</sup> |                    | CHDBrI          |            |                    | CHDBrI <sup>+</sup> |                    |
| $q[\text{\AA}]$      | $V(q)$     | $E^{\text{PV}}(q)$ | $V(q)$              | $E^{\text{PV}}(q)$ | $q[\text{\AA}]$ | $V(q)$     | $E^{\text{PV}}(q)$ | $V(q)$              | $E^{\text{PV}}(q)$ |
| -0.5                 | 3.514E-02  | 3.111E-16          | 3.512E-02           | -1.275E-15         | -0.5            | 8.333E-02  | 9.010E-18          | 8.515E-02           | 2.343E-15          |
| -0.4                 | 2.237E-02  | 2.594E-16          | 2.222E-02           | -9.086E-16         | -0.4            | 6.280E-02  | 1.134E-17          | 6.385E-02           | 1.714E-15          |
| -0.3                 | 1.250E-02  | 2.000E-16          | 1.232E-02           | -6.071E-16         | -0.3            | 4.200E-02  | 9.918E-18          | 4.251E-02           | 1.165E-15          |
| -0.2                 | 5.542E-03  | 1.350E-16          | 5.412E-03           | -3.561E-16         | -0.2            | 2.245E-02  | 6.867E-18          | 2.262E-02           | 7.022E-16          |
| -0.1                 | 1.396E-03  | 6.780E-17          | 1.344E-03           | -1.563E-16         | -0.1            | 6.837E-03  | 3.287E-18          | 6.855E-03           | 3.225E-16          |
| 0                    | 0          | 3.905E-19          | 0                   | -9.433E-21         | 0               | 0          | 3.905E-19          | 0                   | -9.433E-21         |
| 0.1                  | 1.403E-03  | -6.564E-17         | 1.391E-03           | 1.171E-16          | 0.1             | 1.063E-02  | 2.687E-19          | 1.062E-02           | -2.696E-16         |
| 0.2                  | 5.751E-03  | -1.292E-16         | 5.660E-03           | 1.992E-16          | 0.2             | 5.456E-02  | 5.323E-18          | 5.431E-02           | -4.966E-16         |
| 0.3                  | 1.325E-02  | -1.894E-16         | 1.302E-02           | 2.494E-16          | 0.3             | 1.614E-01  | 2.540E-17          | 1.601E-01           | -6.775E-16         |
| 0.4                  | 2.401E-02  | -2.454E-16         | 2.362E-02           | 2.769E-16          | 0.4             | 3.890E-01  | 4.732E-17          | 3.845E-01           | -8.162E-16         |
| 0.5                  | 3.799E-02  | -2.968E-16         | 3.744E-02           | 2.956E-16          | 0.5             | 8.556E-01  | 8.557E-17          | 8.428E-01           | -8.891E-16         |
| Fitting Coefficients |            |                    |                     |                    |                 |            |                    |                     |                    |
| $C_6$                | -1.714E-03 | 3.658E-18          | -1.963E-03          | 1.331E-17          | $C_6$           | 1.544E-01  | 1.354E-18          | 1.495E-01           | -6.855E-17         |
| $C_5$                | -8.079E-04 | 2.474E-18          | -6.360E-04          | 3.787E-17          | $C_5$           | 2.552E-01  | -1.327E-17         | 2.481E-01           | 1.095E-16          |
| $C_4$                | 3.659E-03  | -1.781E-17         | 4.516E-03           | -4.292E-18         | $C_4$           | 1.793E-01  | -1.603E-20         | 1.766E-01           | 1.873E-16          |
| $C_3$                | 2.477E-03  | 3.467E-17          | 1.856E-03           | 8.855E-17          | $C_3$           | 2.235E-01  | 6.733E-17          | 2.213E-01           | -2.785E-16         |
| $C_2$                | 3.906E-02  | 2.057E-17          | 3.817E-02           | -5.556E-16         | $C_2$           | 2.429E-01  | 5.206E-17          | 2.430E-01           | 7.011E-16          |
| $C_1$                | -5.977E-05 | -3.546E-16         | 7.600E-05           | 7.218E-16          | $C_1$           | 5.558E-03  | -9.208E-18         | 5.455E-03           | -1.549E-15         |
| $C_0$                | -2.932E-07 | 3.640E-19          | -1.000E-06          | 3.134E-19          | $C_0$           | -1.500E-04 | -2.061E-19         | -1.450E-04          | 3.756E-19          |

| Mode 9               |            |                    |                     |                    |
|----------------------|------------|--------------------|---------------------|--------------------|
| $q[\text{\AA}]$      | CHDBrI     |                    | CHDBrI <sup>+</sup> |                    |
|                      | $V(q)$     | $E^{\text{PV}}(q)$ | $V(q)$              | $E^{\text{PV}}(q)$ |
| -0.5                 | 6.915E-01  | -6.995E-18         | 6.957E-01           | 9.798E-16          |
| -0.4                 | 3.234E-01  | 1.200E-17          | 3.256E-01           | 8.659E-16          |
| -0.3                 | 1.373E-01  | 2.682E-17          | 1.384E-01           | 6.981E-16          |
| -0.2                 | 4.722E-02  | 2.411E-17          | 4.770E-02           | 5.002E-16          |
| -0.1                 | 9.326E-03  | 1.412E-17          | 9.456E-03           | 2.652E-16          |
| 0                    | 0          | 3.905E-19          | 0                   | -9.433E-21         |
| 0.1                  | 6.185E-03  | -1.489E-17         | 6.234E-03           | -2.985E-16         |
| 0.2                  | 2.048E-02  | -2.970E-17         | 2.075E-02           | -6.410E-16         |
| 0.3                  | 3.865E-02  | -4.283E-17         | 3.929E-02           | -1.024E-15         |
| 0.4                  | 5.825E-02  | -5.266E-17         | 5.940E-02           | -1.476E-15         |
| 0.5                  | 7.786E-02  | -5.746E-17         | 7.969E-02           | -1.996E-15         |
| Fitting Coefficients |            |                    |                     |                    |
| $C_6$                | 1.029E-01  | 5.609E-17          | 1.036E-01           | -1.308E-17         |
| $C_5$                | -1.802E-01 | -1.667E-17         | -1.811E-01          | 1.849E-17          |
| $C_4$                | 1.504E-01  | -8.514E-17         | 1.507E-01           | -9.008E-17         |
| $C_3$                | -1.990E-01 | 7.785E-17          | -1.993E-01          | -1.128E-16         |
| $C_2$                | 2.147E-01  | -4.778E-18         | 2.172E-01           | -4.785E-16         |
| $C_1$                | -3.400E-03 | -8.277E-17         | -3.626E-03          | -1.489E-15         |
| $C_0$                | -9.000E-05 | -5.081E-20         | -9.100E-05          | 2.324E-19          |

## S6. Orbital contributions analysis for mode 6 of CHD-BrI and CHDBrI<sup>+</sup>

Figure S4 presents the atomic contributions to the total PV energy difference for mode 6 of CHDBrI and CHDBrI<sup>+</sup>. For both species, the bromine and iodine contributions dominate over the lighter atoms, but we observe a very different behaviour of the two molecules for mode 6. For the cation, the shape of the PV curve exhibits a strong curvature, while for the neutral molecule we see an almost linear behaviour (for the total as well as atomic PV contributions). The latter leads to a very small PV vibrational frequency shift as the second derivative  $\partial^2 E^{\text{PV}}/\partial q^2(q=0)$  becomes zero (or close to zero). To understand this different behaviour we further consider the individual molecular orbital (MO) contributions of the two atoms Br and I contributing most to the PV energy shift.

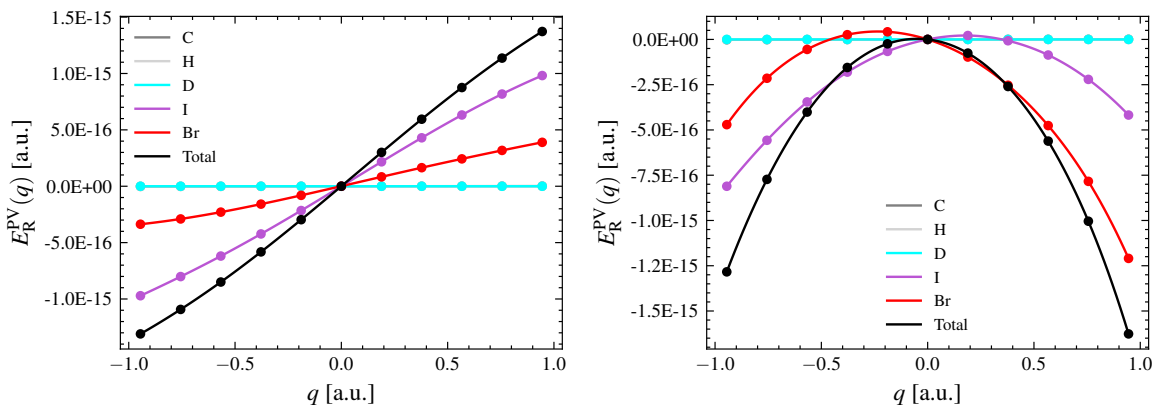

Figure S4: Breakdown of the atomic contributions to the total PV energy  $E^{\text{PV}}(q)$  along mode 6 in (R)-CHDBrI (left) and (R)-CHDBrI<sup>+</sup> (right).

There are in total 48 occupied MOs in our calculations for CHDBrI. The important MOs that we focus on in our analysis are the HOMO/SOMO (MO 48) and the added orbital contributions from the 47 orbitals up to and including HOMO/SOMO – 1 (MOs 1–47). This breakdown is shown in the top plots of Figure S5. For both CHDBrI and CHDBrI<sup>+</sup> we observe, for the PV contributions from MOs 1–47, an almost harmonic PV curve of (approximately) second order in  $q$  with bromine being the main contributor to the PV. However, the MO 48 (HOMO/SOMO) contribution shown changes the shape of the total PV curve shown in middle plots of Figure S5 to an odd function of (approximately) third order in  $q$  for the neutral molecule, in contrast to the cationic species. This analysis suggests that the removal of a HOMO electron from the neutral molecule makes the contribution from the inner orbitals dominant, which translates into a function that has a stronger curvature. Further support of this argument can be seen from the bottom panels in Figure S5 where i) doubling of the SOMO contribution in the cation (artificial addition of 1 electron) results in a pseudo-neutral system with suppressed curvature in the PV curve (bottom right) resembling the neutral molecule (middle left); ii) halving the HOMO contribution in the neutral system (artificial removal of 1 electron) results in a pseudo-cation with increased curvature of the PV curve (bottom left) resembling the unaltered cation (middle right).

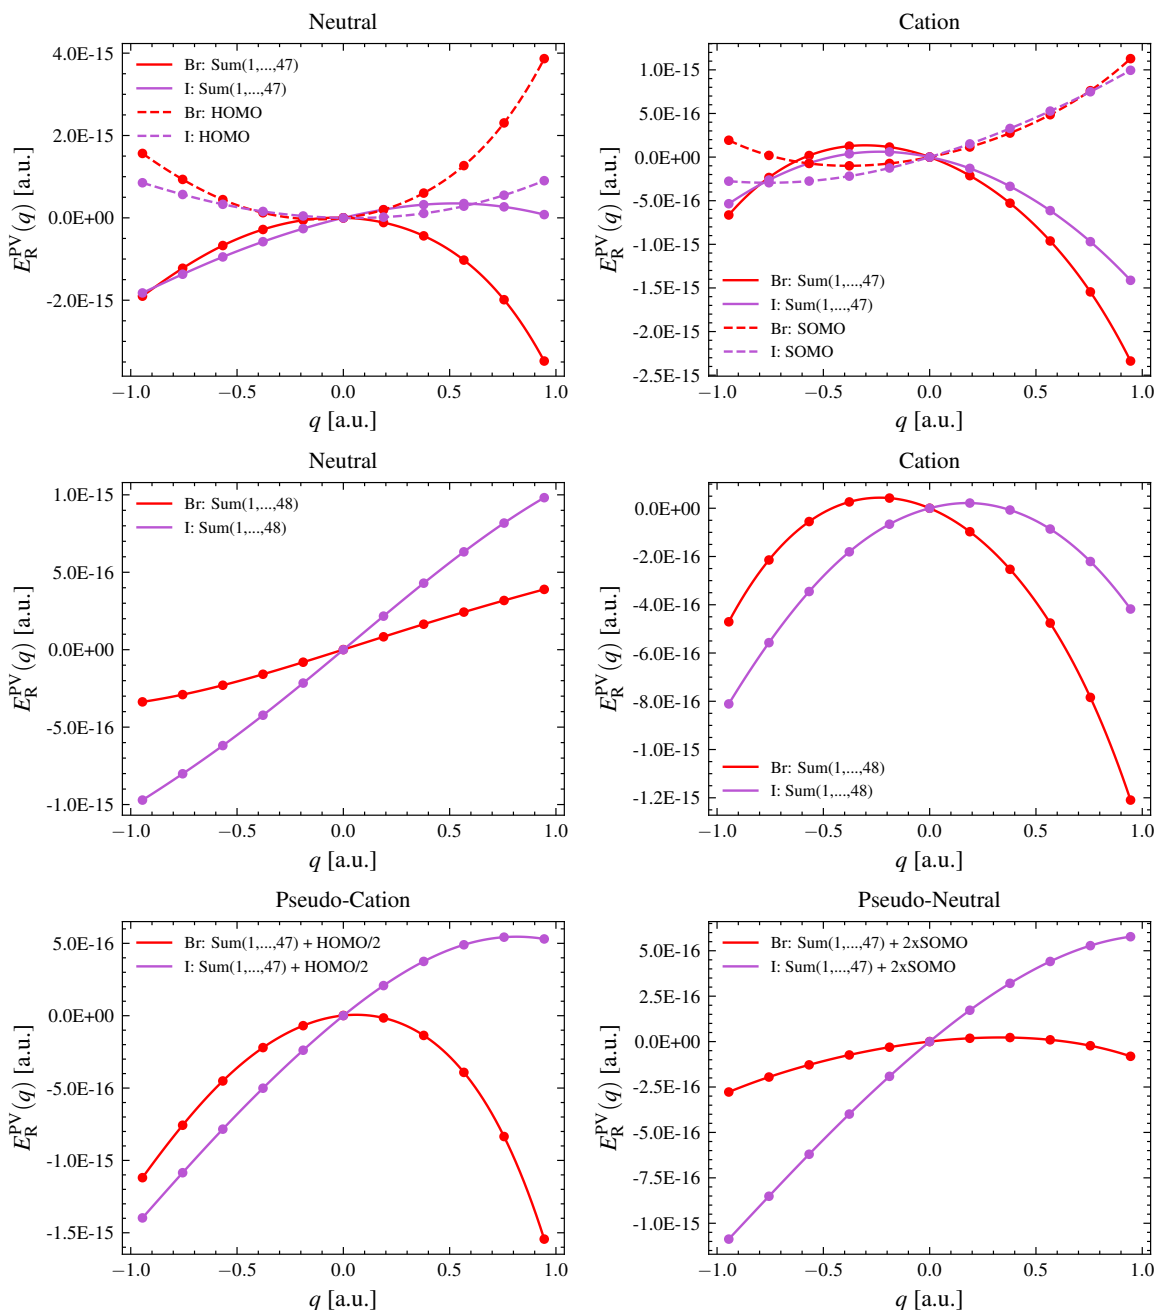

Figure S5: Orbital contributions of PV energies  $E_R^{PV}(q)$  along mode 6 in the neutral (left) and cation (right) of (R)-CHDBrI. Top: Added PV contributions up to and including the HOMO/SOMO - 1 orbital (MO 47) and separate HOMO/SOMO (MO 48) contribution. Middle: Added PV contributions up to and including MO 48 (HOMO/SOMO). Bottom: Artificial electron removal/addition in (R)-CHDBrI/(R)-CHDBrI<sup>+</sup> (left/right panel) by means of halving/doubling the HOMO/SOMO (MO 48) contribution.

## S7. Chiral Density Analysis

In an attempt to provide rationalization for the observed enhancement of the PV shift in  $\text{CHDBrI}^+$  compared to the parent  $\text{CHDBrI}$  molecule, we visualize the changes in the chiral density  $\gamma^5(r)$  in the vicinity of Br and I nuclei along the vibrational mode 6 in Figures S6–S11. We show spatial isocontour plots in Figure S7 and break these down into respective radial (Figure S6) and angular parts (Figures S8–S11).

We make several observations. In general, the chiral density exhibits the most structure in the near vicinity of the nucleus in the radial region between 0.001 – 0.01 a.u. (see contour plots in Figure S7). In contrast, the intranuclear region is mostly featureless and practically homogenous (see the leftmost columns in Figures S8–S11 as well as the plateau in the shaded nuclear region of the radial plots in Figure S6). This is also consistent with the insensitivity of the PV energy shifts to the employed nuclear models. Chiral density in the outer region beyond 0.2 a.u. is practically zero and is thus of no importance on the scales of the chemical bonding.

The maximum amplitude of the chiral density is up to  $10\times$  larger in the cation as compared to the neutral  $\text{CHDBrI}$  (note the scales in angular plots and contour values in spatial plots). However, this is mostly observed in the extra-nuclear region. In the intra-nuclear region, the amplitudes of the chiral densities are comparable in both systems. In all cases, the radial distribution (Figure S6) is significantly suppressed in the extra-nuclear region due to the angular averaging of the chiral density structure. This is the case even in  $\text{CHDBrI}^+$  where the absolute amplitudes outside of the nuclear region are much larger, yet their angular average is still suppressed.

The spatial plots in Figure S7 show the changes in chiral density along the mode are more pronounced in  $\text{CHDBrI}$ , where the isocontour shapes morph significantly. In  $\text{CHDBrI}^+$ , one can observe slight rotation and subtle changes in the overall shape of the contours. Interestingly, in  $\text{CHDBrI}$ , the endpoints at  $q = -0.5 \text{ \AA}$  and  $q = 0.5 \text{ \AA}$  are practically mirror and sign reflections of one another supporting the close to linear odd-functional behavior of

the  $E^{\text{PV}}(q)$  curve in Figure S3 in Section S5. In both systems, the spatial extent of the chiral density contours appear larger around Br as compared to I.

Similar conclusions can be drawn for the chiral density plots in the remaining vibrational modes, we thus omit these for sake of brevity and size of the ESI file. All chiral density visualization calculations were performed using DIRAC19.<sup>25</sup>

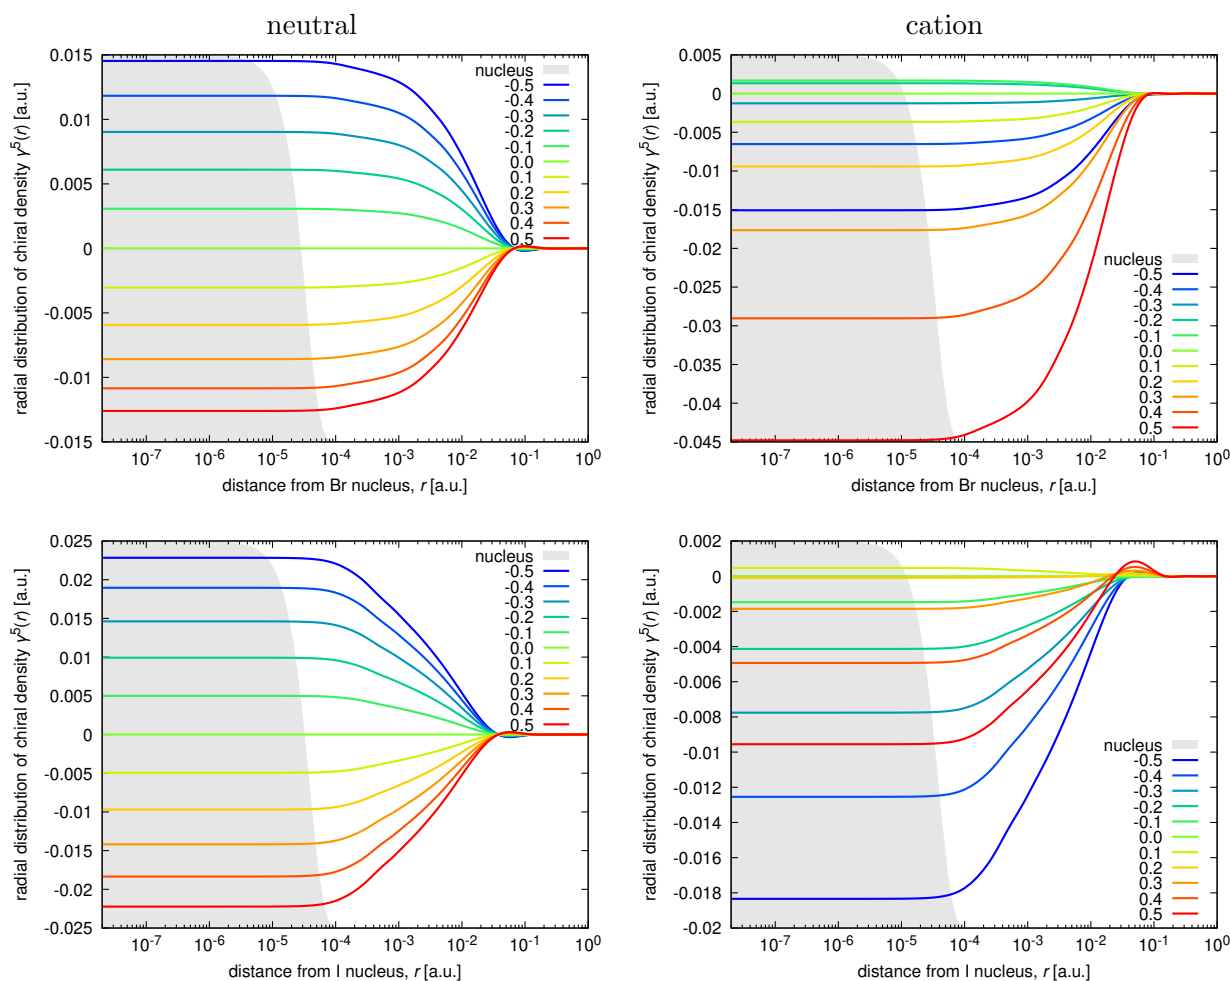

Figure S6: Radial distributions of chiral density  $\gamma^5(r)$  (in a.u.) around Br and I nuclei in CHDBrI and CHDBrI<sup>+</sup> for displacements between  $q \in \langle -0.5, 0.5 \rangle$  Å along vibrational mode 6. Nuclear charge distribution is represented by the grey shaded area.

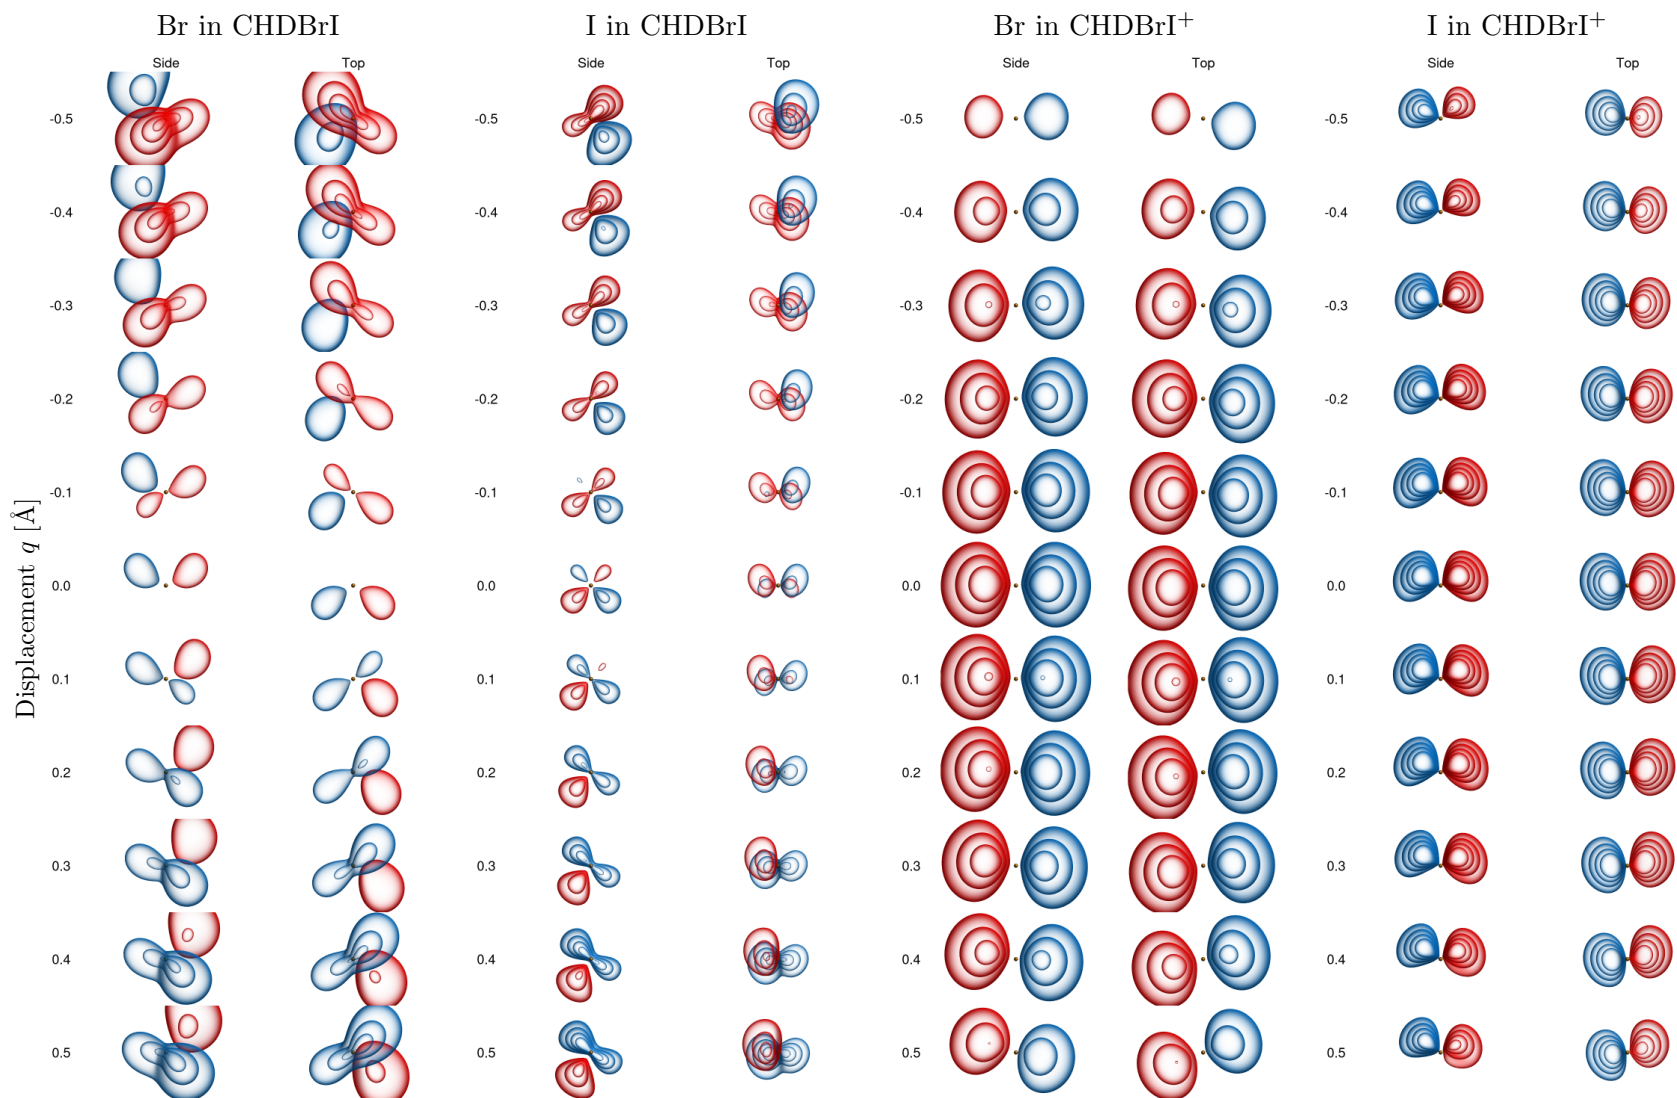

Figure S7: Spatial isocontour plots of chiral density  $\gamma^5(r)$  (in a.u.) around the Br and I nuclei for displacements between  $q \in \langle -0.5, 0.5 \rangle$  Å along the vibrational mode 6. The width of each plotted box is 0.15 a.u.. Note, the scales for CHDBrI and CHDBrI<sup>+</sup> are vastly different – for CHDBrI, we use contour values  $\pm 0.0003$ ,  $\pm 0.0005$ ,  $\pm 0.0007$ ,  $\pm 0.0009$  a.u.; for CHDBrI<sup>+</sup>, we use contour values  $\pm 0.005$ ,  $\pm 0.007$ ,  $\pm 0.009$ ,  $\pm 0.011$  a.u.; positive contours are plotted in red, negative in blue.



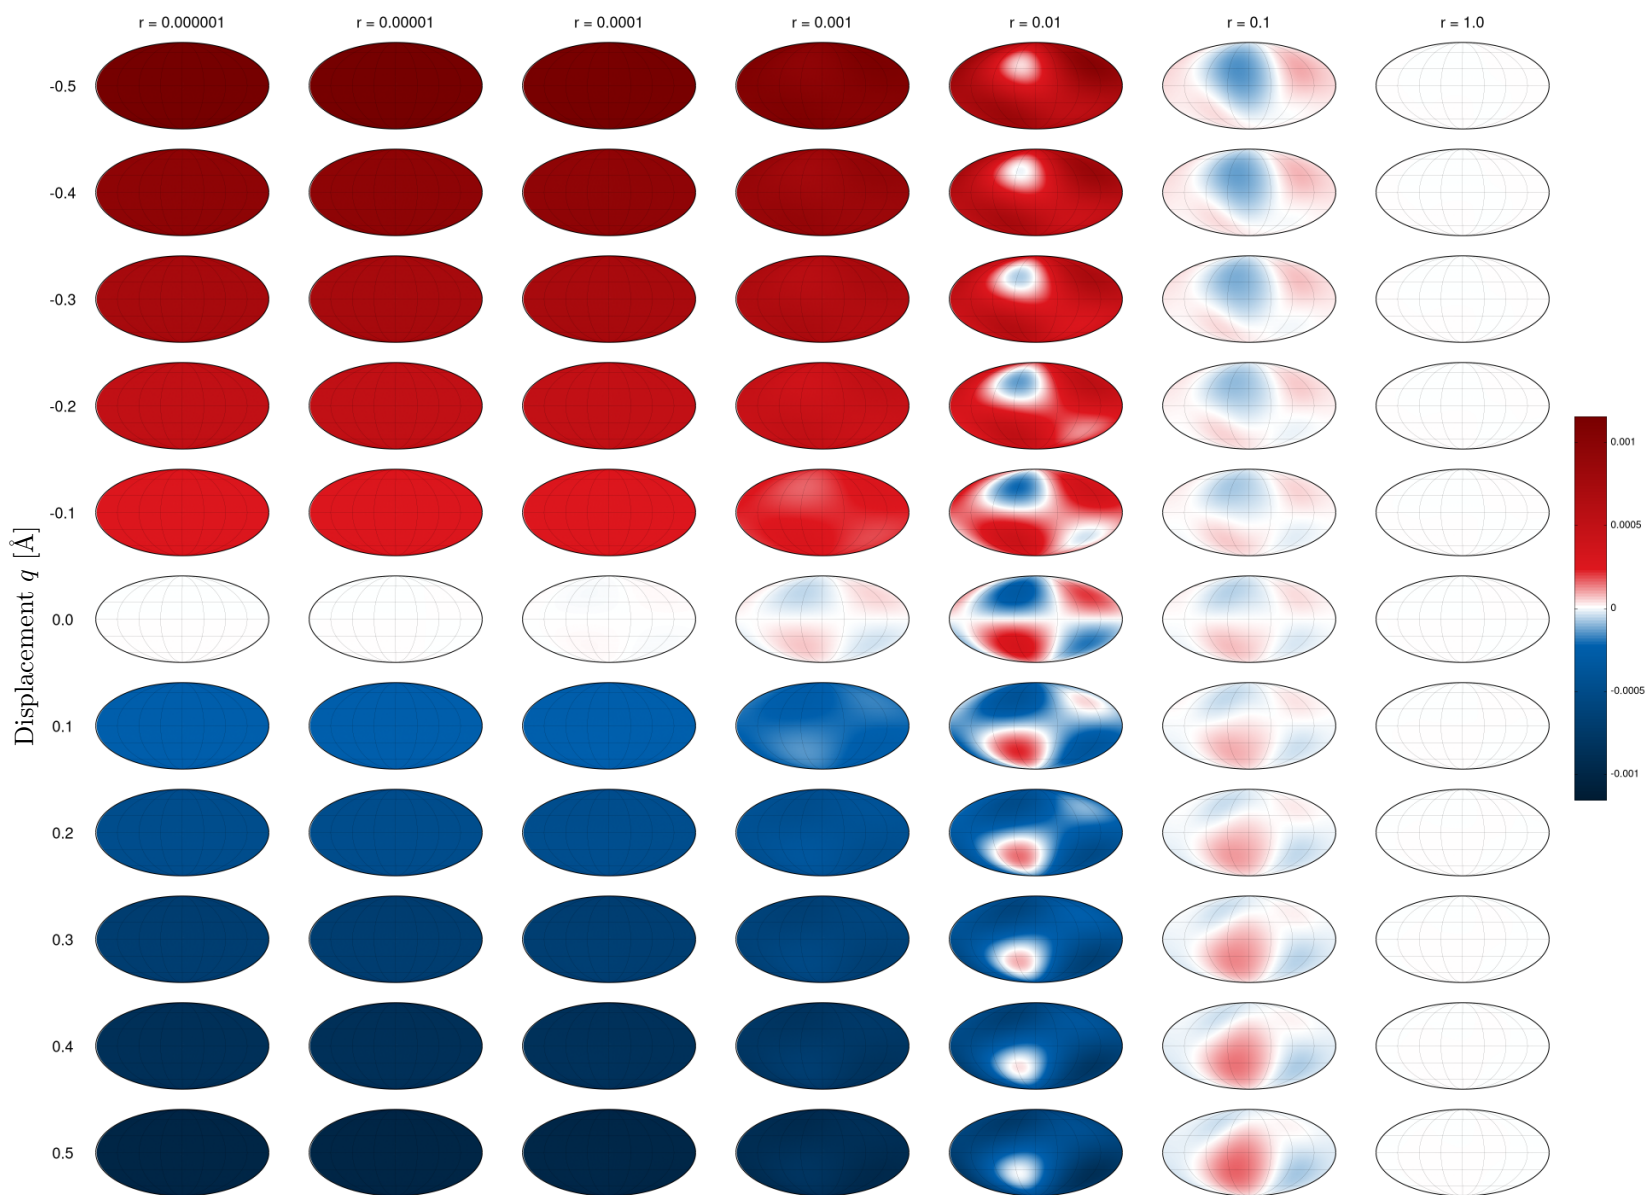

Figure S8: Angular distribution of chiral density  $\gamma^5(r)$  (in a.u.) in Mollweide projection over different sized concentric radial shells around the Br nucleus in CHDBrI (columns) for displacements  $q \in \langle -0.5, 0.5 \rangle$  Å along vibrational mode 6 (rows).

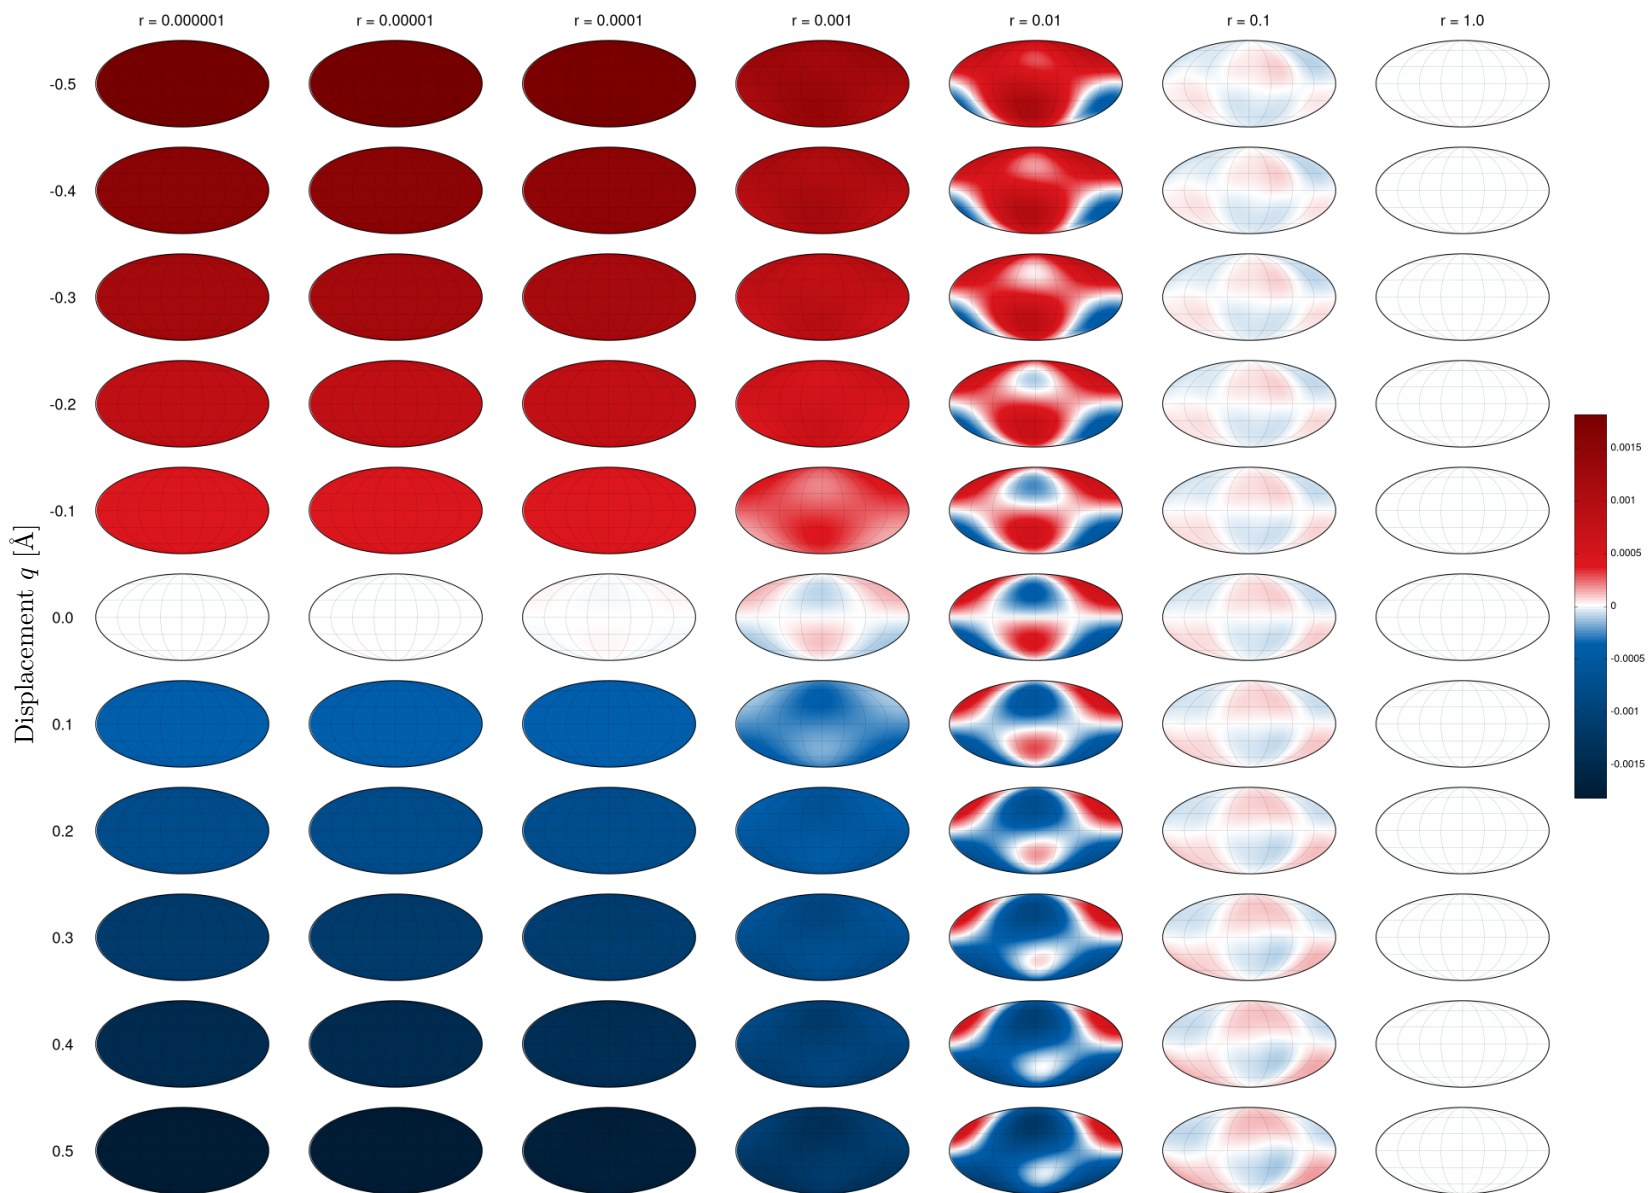

Figure S9: Angular distribution of chiral density  $\gamma^5(r)$  (in a.u.) in Mollweide projection over different sized concentric radial shells around the I nucleus in CHDBrI (columns) for displacements  $q \in \langle -0.5, 0.5 \rangle$  Å along vibrational mode 6 (rows).

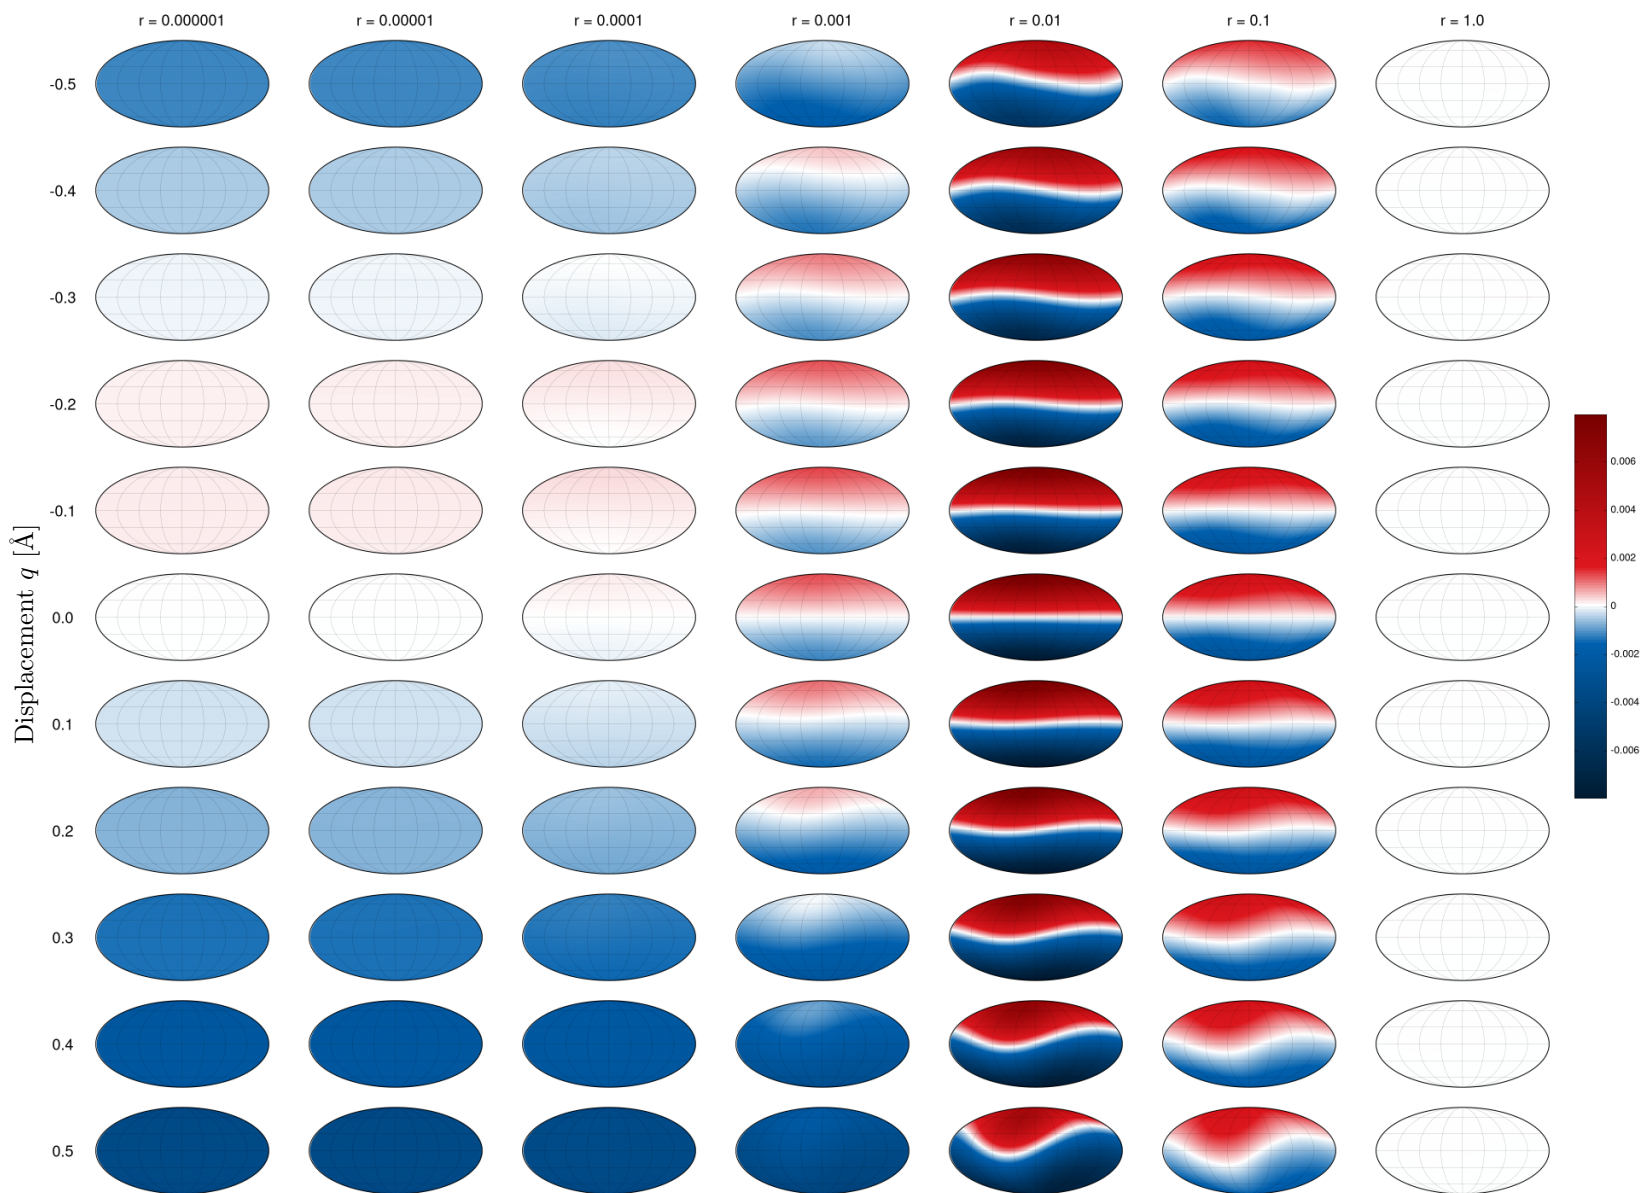

Figure S10: Angular distribution of chiral density  $\gamma^5(r)$  (in a.u.) in Mollweide projection over different sized concentric radial shells around the Br nucleus in  $\text{CHDBrI}^+$  (columns) for displacements  $q \in \langle -0.5, 0.5 \rangle$  Å along vibrational mode 6 (rows).

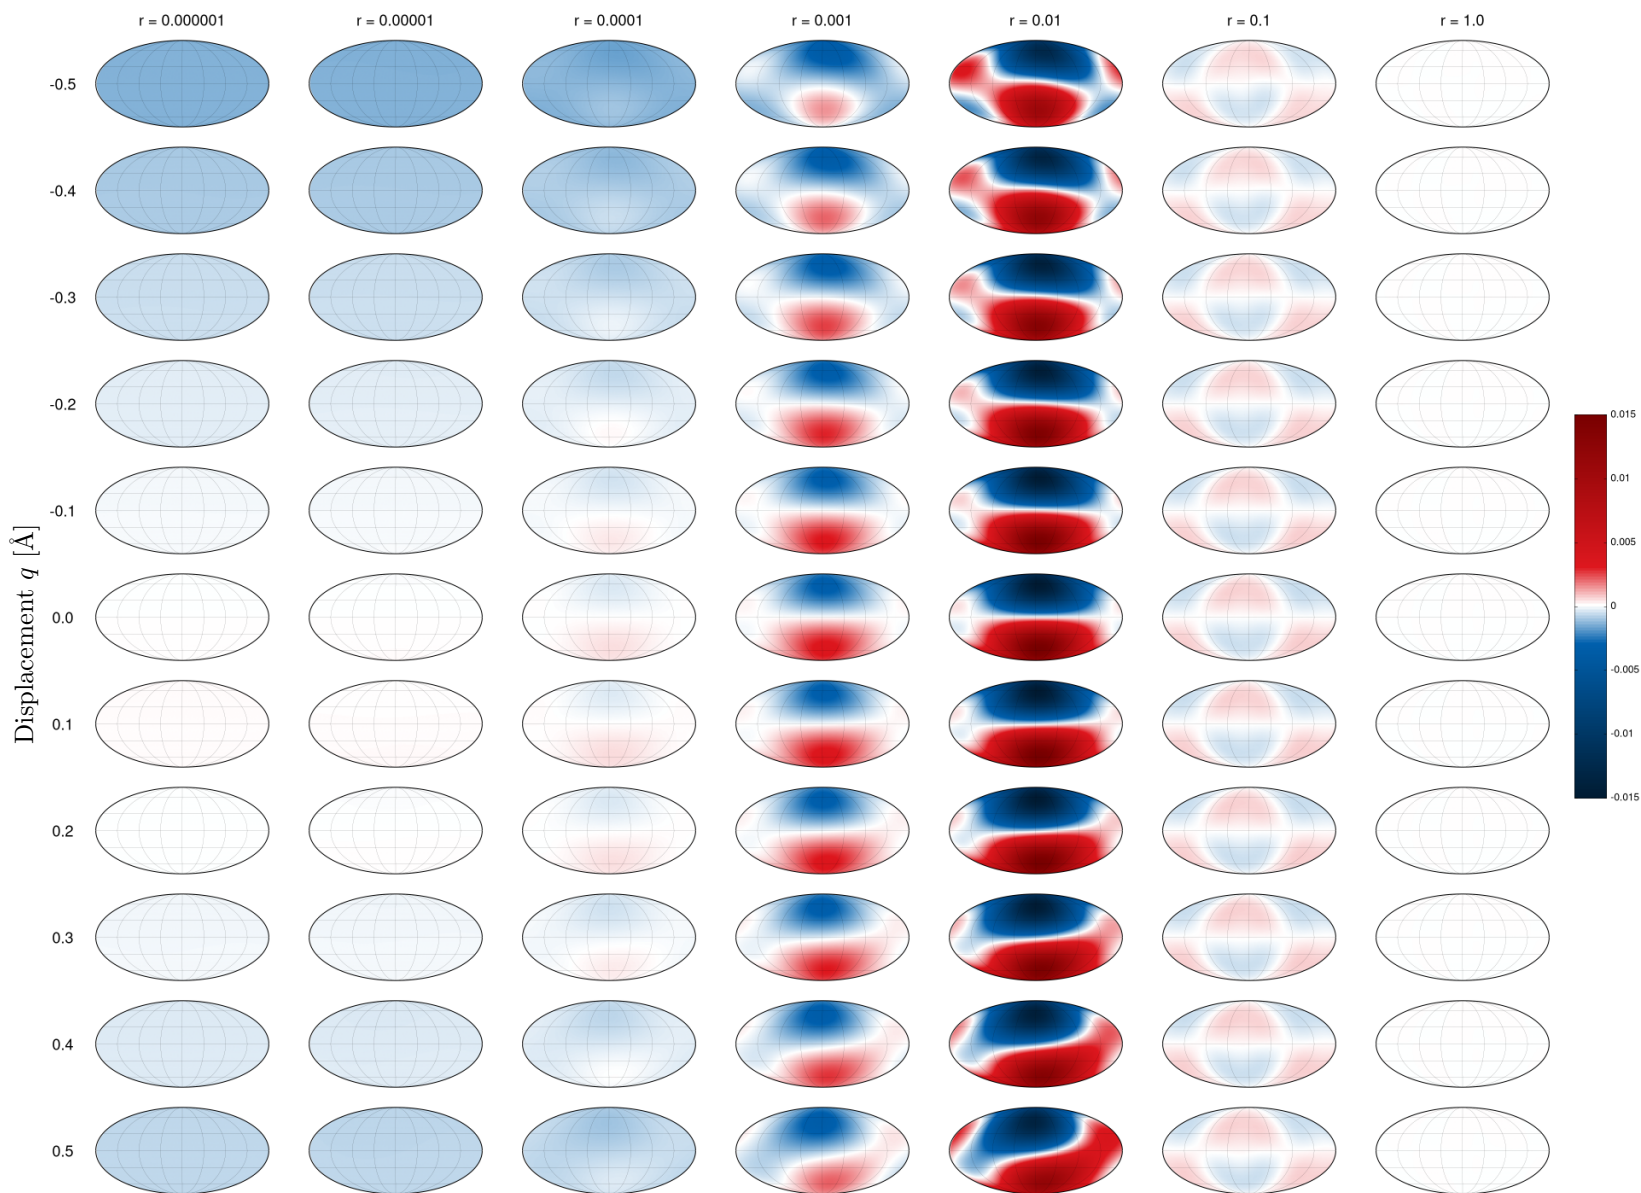

Figure S11: Angular distribution of chiral density  $\gamma^5(r)$  (in a.u.) in Mollweide projection over different sized concentric radial shells around the I nucleus in CHDBrI<sup>+</sup> (columns) for displacements  $q \in \langle -0.5, 0.5 \rangle$  Å along vibrational mode 6 (rows).

## S8. Additional Information

Figures S12–S19 show orbital decomposition analysis for modes 1–5 and 7–9 analogous to that of mode 6 shown on Figure S5 and discussed in Section S6. The analysis of the increased and decreased curvature caused by the cancellation effects between MOs 1–47 and MO 48 is however, less applicable in the general case. The effect in mode 5 is very similar to that observed in mode 6 in Figure S5 as both of these modes are similar in nature (C–H and C–D wag, respectively)

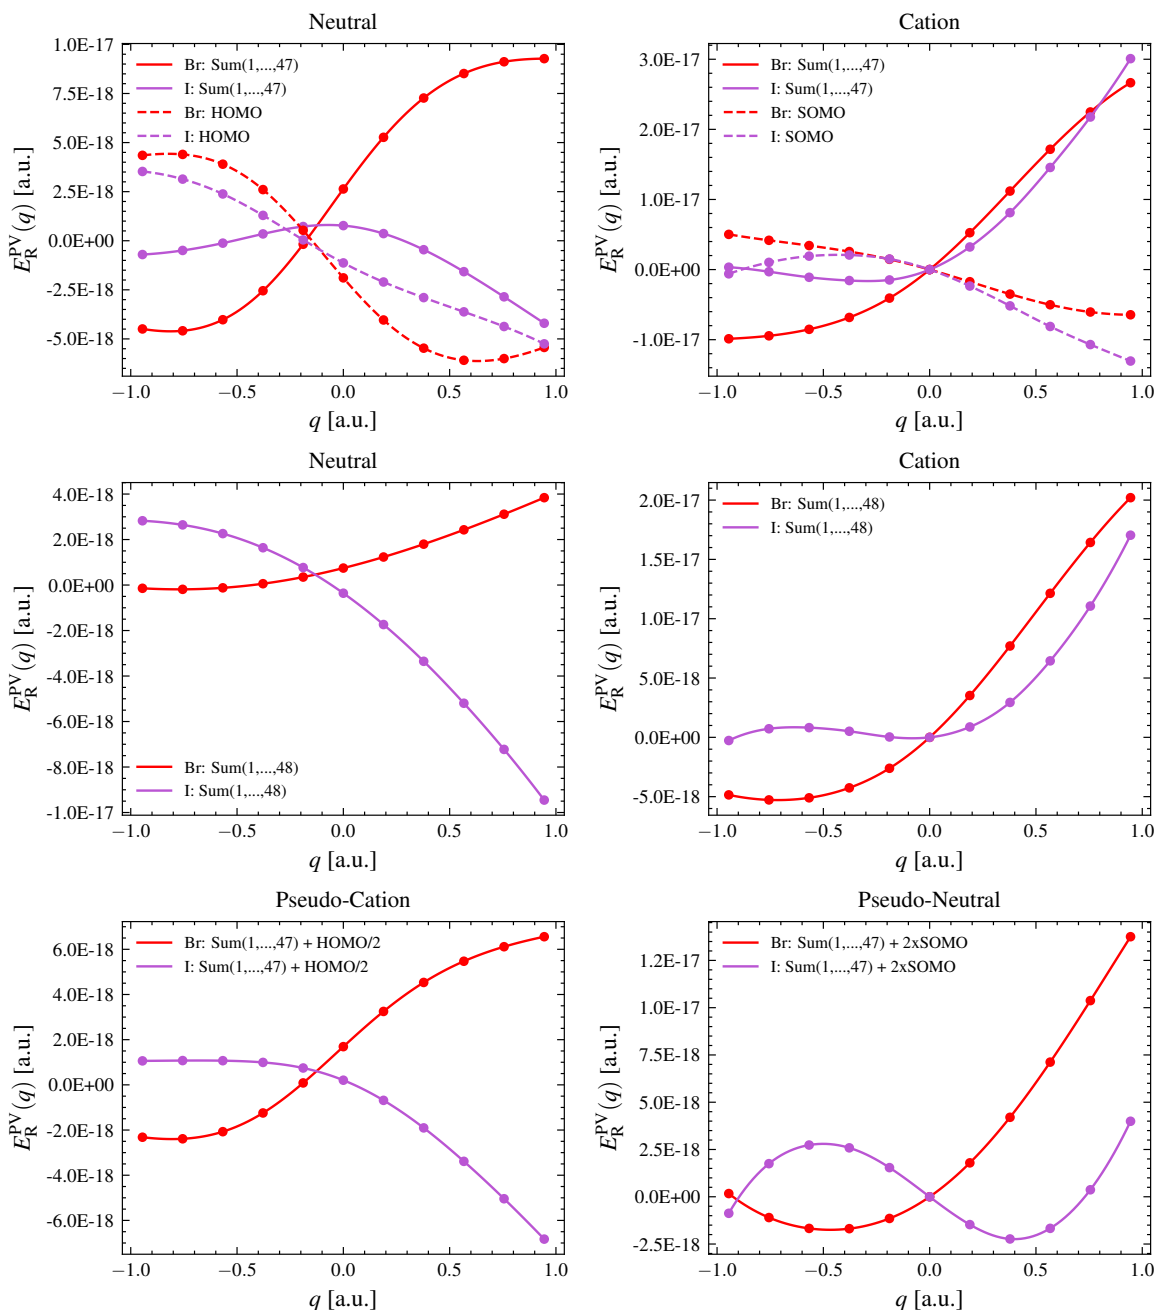

Figure S12: Orbital contributions of PV energies  $E_R^{PV}(q)$  along mode 1 in the neutral (left) and cation (right) of (R)-CHDBrI. Top: Added PV contributions up to and including the HOMO/SOMO – 1 orbital (MO 47) and separate HOMO/SOMO (MO 48) contribution. Middle: Added PV contributions up to and including MO 48 (HOMO/SOMO). Bottom: Artificial electron removal/addition in (R)-CHDBrI/(R)-CHDBrI<sup>+</sup> (left/right panel) by means of halving/doubling the HOMO/SOMO (MO 48) contribution.

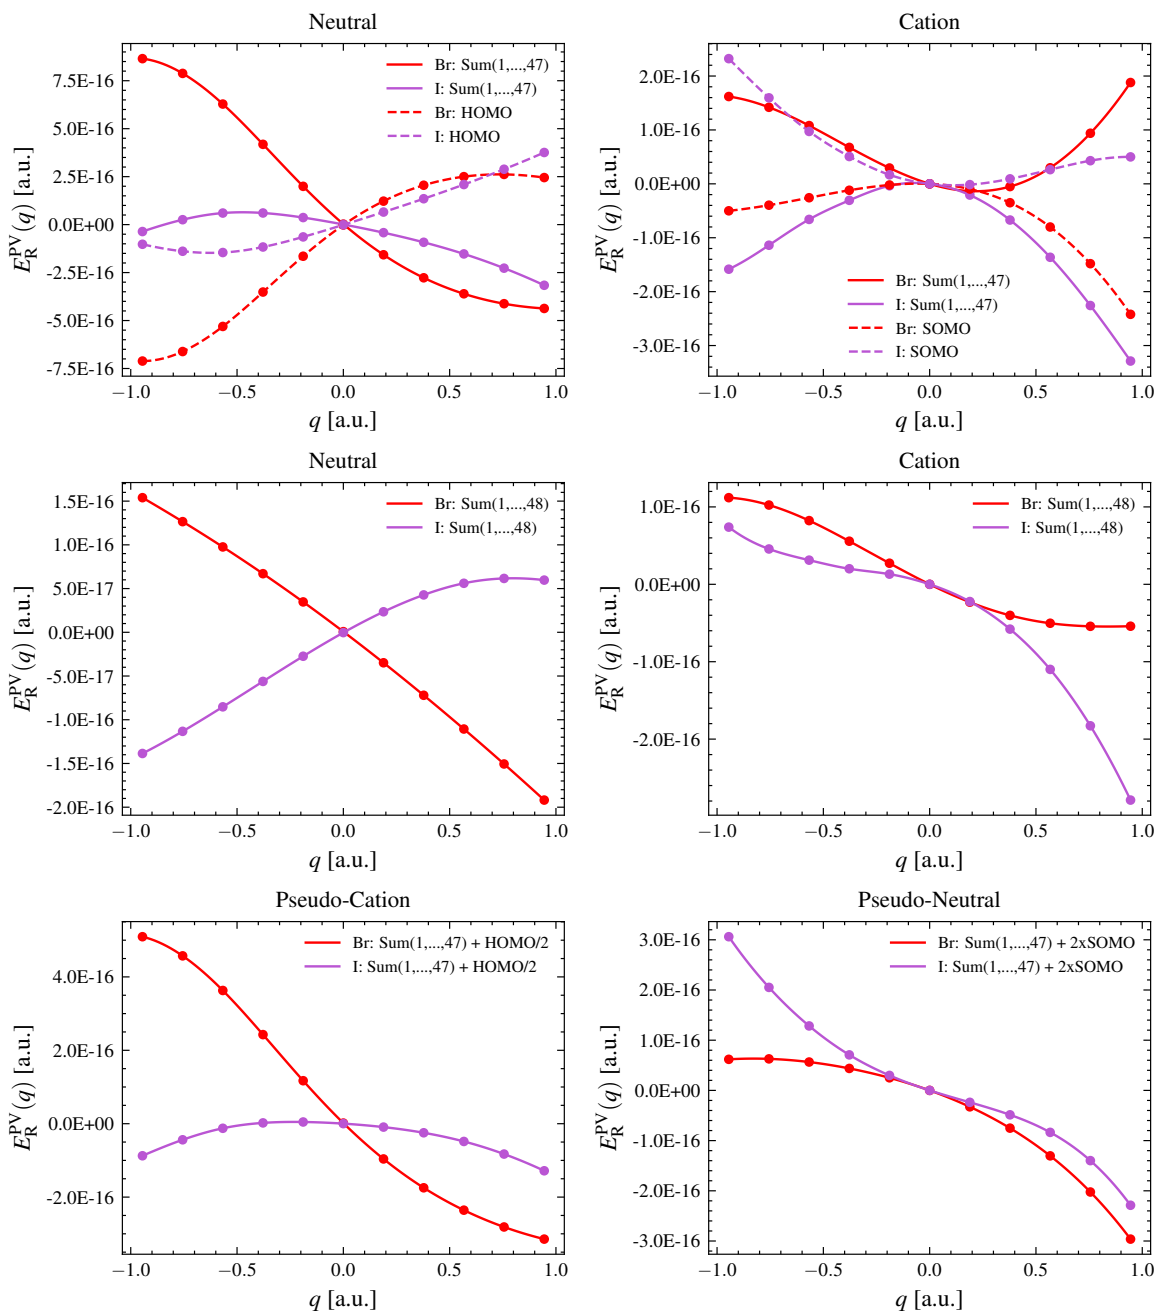

Figure S13: Orbital contributions of PV energies  $E_R^{PV}(q)$  along mode 2 in the neutral (left) and cation (right) of (R)-CHDBrI. Top: Added PV contributions up to and including the HOMO/SOMO - 1 orbital (MO 47) and separate HOMO/SOMO (MO 48) contribution. Middle: Added PV contributions up to and including MO 48 (HOMO/SOMO). Bottom: Artificial electron removal/addition in (R)-CHDBrI/(R)-CHDBrI<sup>+</sup> (left/right panel) by means of halving/doubling the HOMO/SOMO (MO 48) contribution.

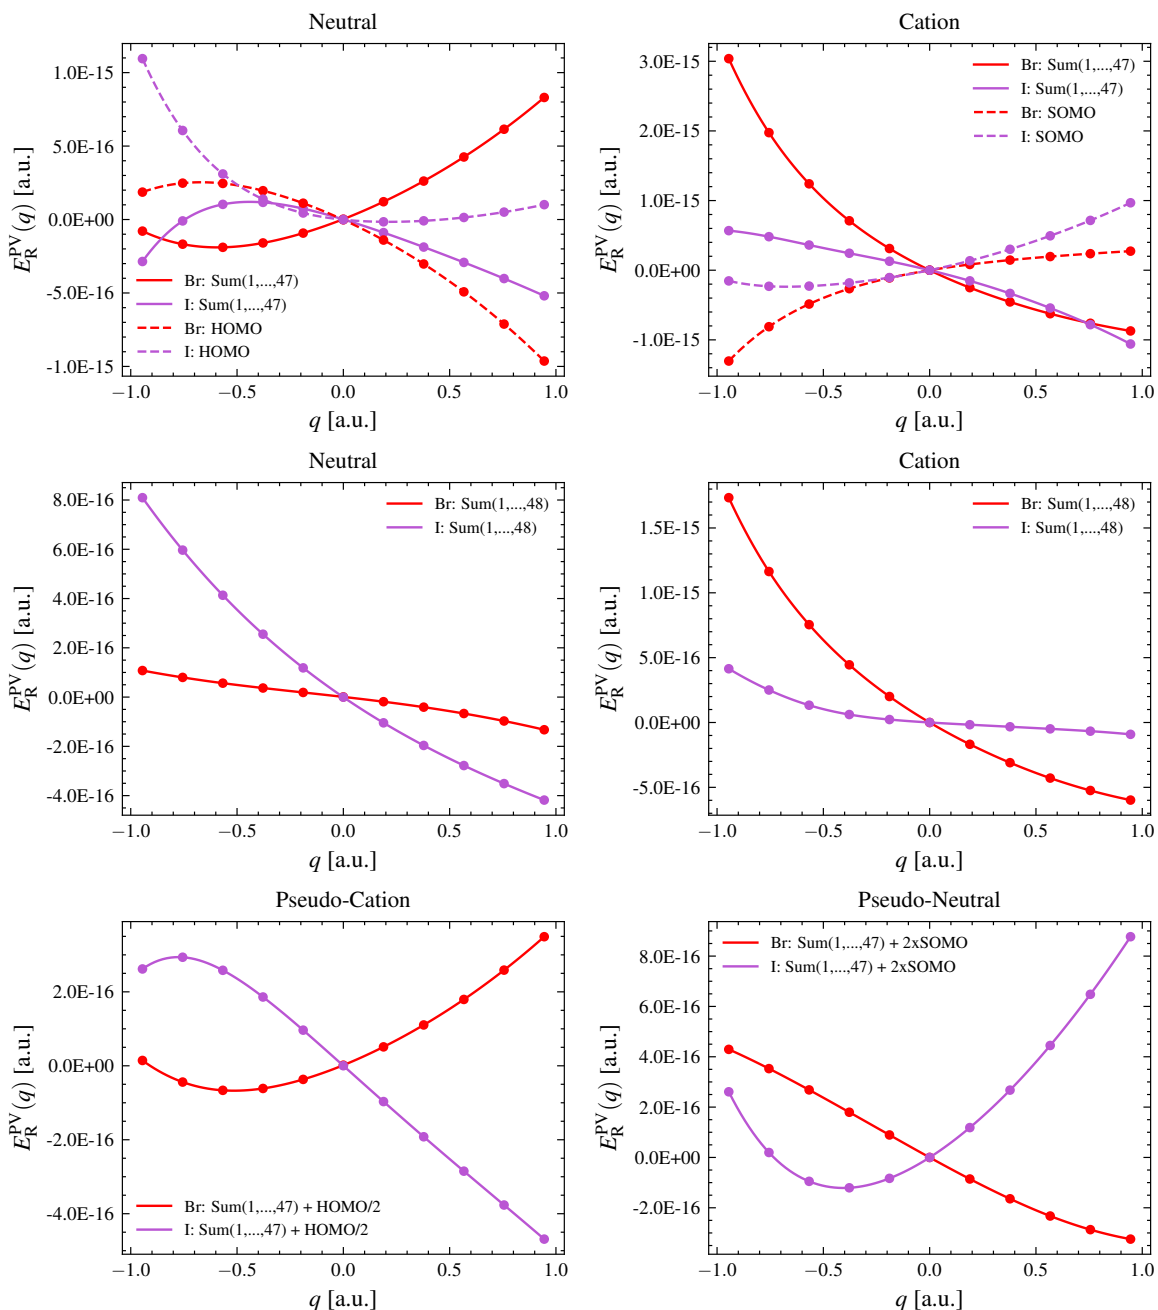

Figure S14: Orbital contributions of PV energies  $E_R^{PV}(q)$  along mode 3 in the neutral (left) and cation (right) of (R)-CHDBrI. Top: Added PV contributions up to and including the HOMO/SOMO - 1 orbital (MO 47) and separate HOMO/SOMO (MO 48) contribution. Middle: Added PV contributions up to and including MO 48 (HOMO/SOMO). Bottom: Artificial electron removal/addition in (R)-CHDBrI/(R)-CHDBrI<sup>+</sup> (left/right panel) by means of halving/doubling the HOMO/SOMO (MO 48) contribution.



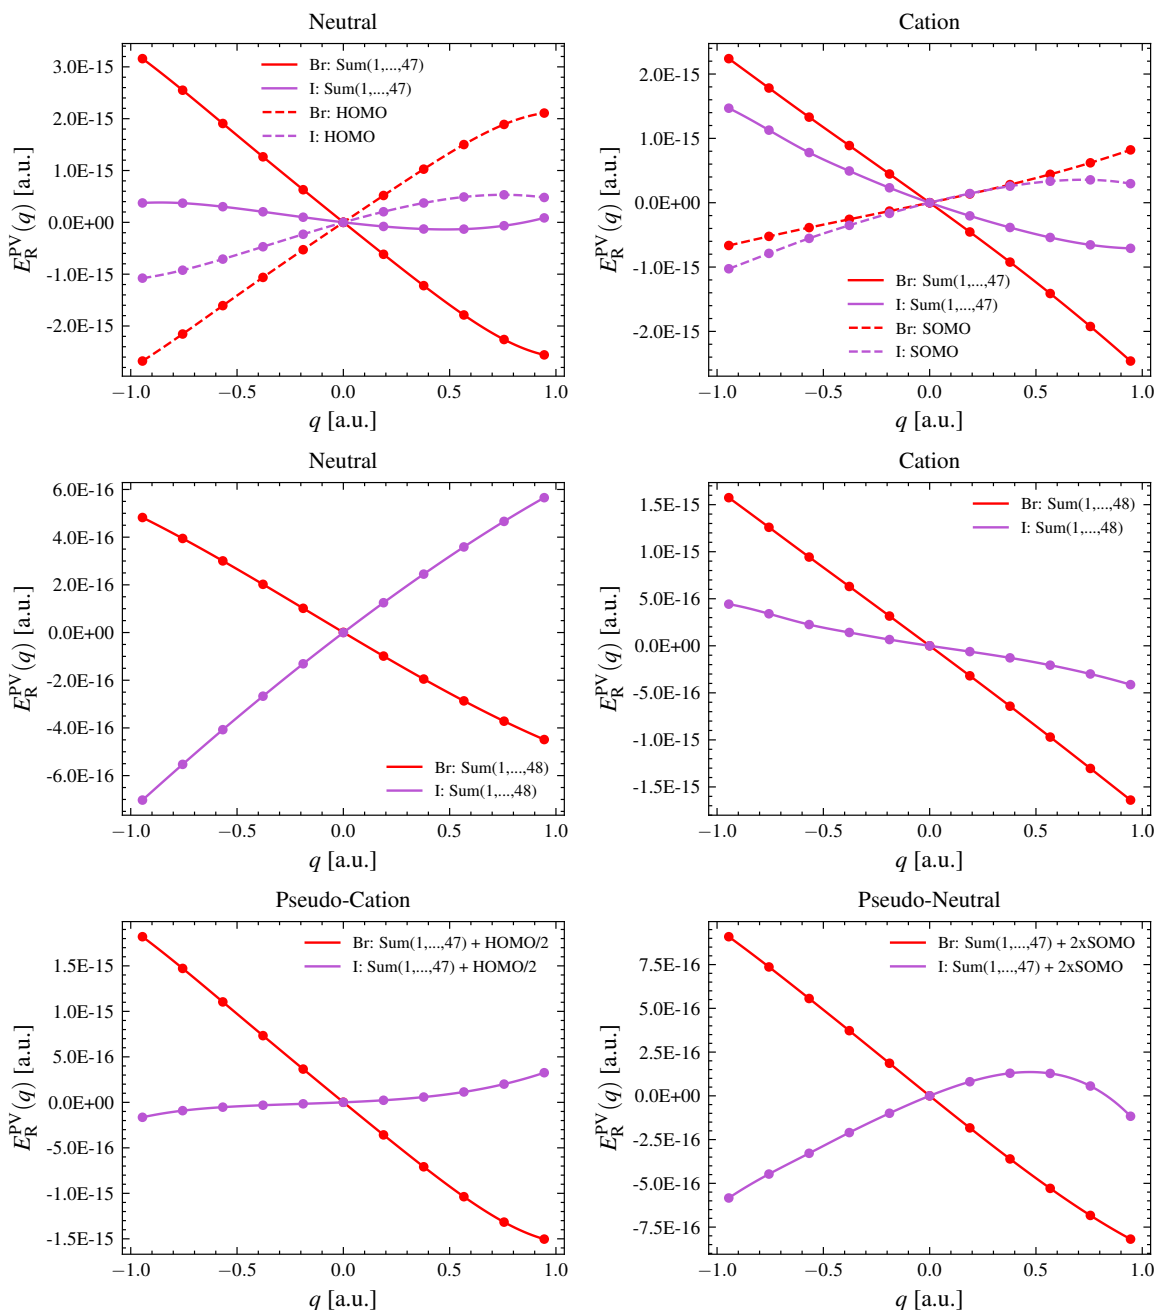

Figure S15: Orbital contributions of PV energies  $E_R^{\text{PV}}(q)$  along mode 4 in the neutral (left) and cation (right) of (R)-CHDBrI. Top: Added PV contributions up to and including the HOMO/SOMO – 1 orbital (MO 47) and separate HOMO/SOMO (MO 48) contribution. Middle: Added PV contributions up to and including MO 48 (HOMO/SOMO). Bottom: Artificial electron removal/addition in (R)-CHDBrI/(R)-CHDBrI<sup>+</sup> (left/right panel) by means of halving/doubling the HOMO/SOMO (MO 48) contribution.

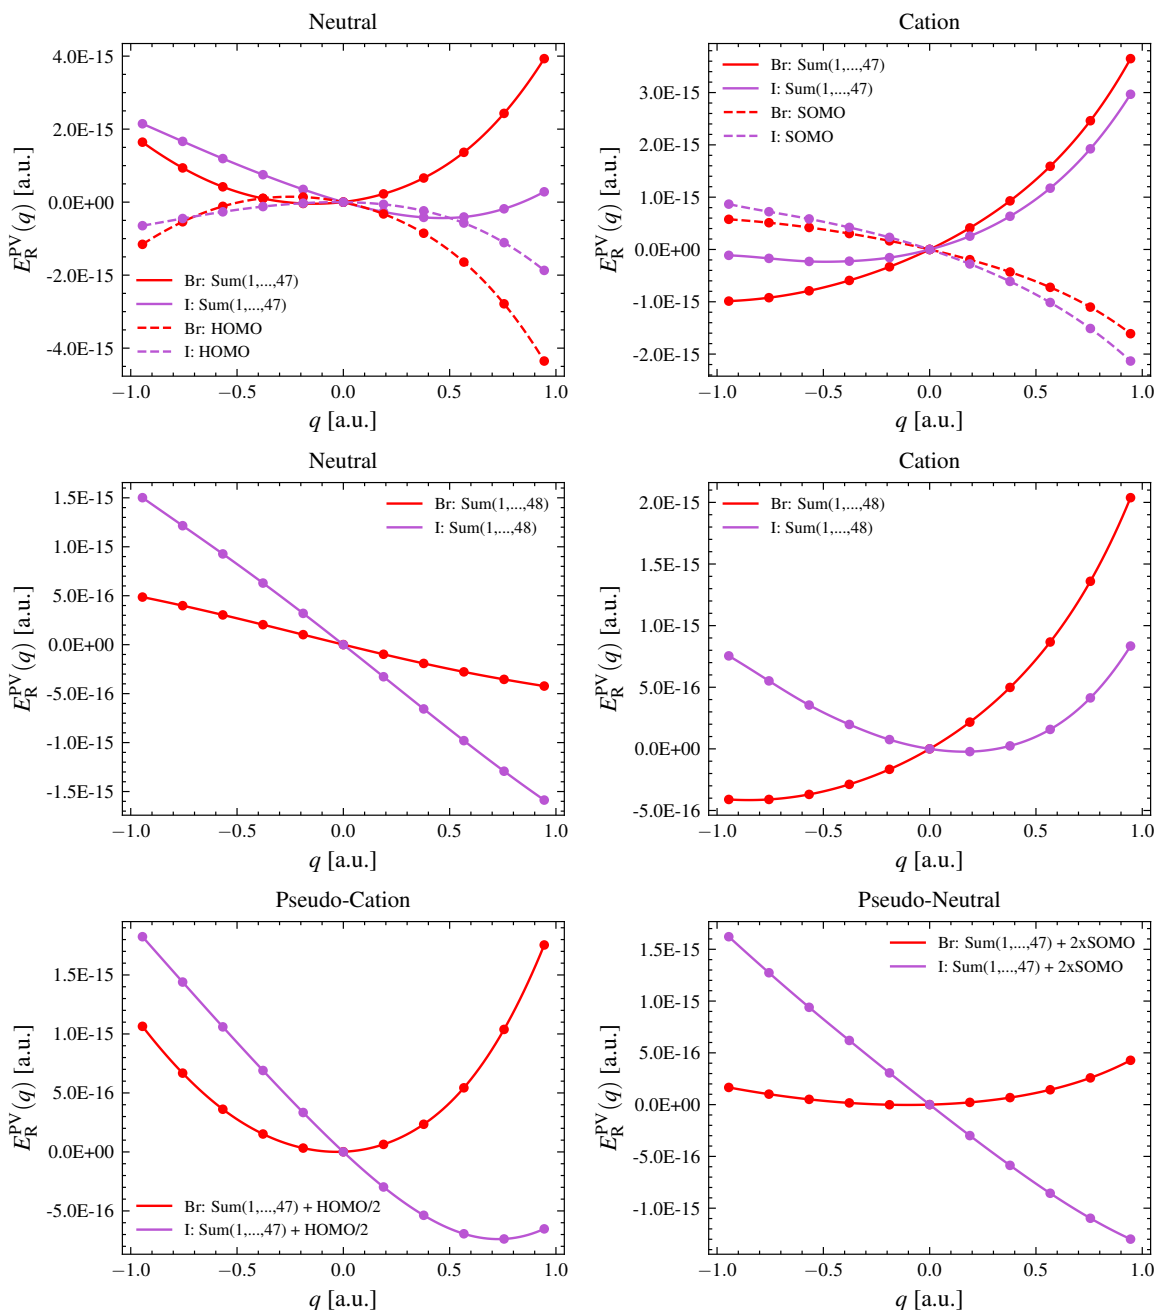

Figure S16: Orbital contributions of PV energies  $E_R^{PV}(q)$  along mode 5 in the neutral (left) and cation (right) of (R)-CHDBrI. Top: Added PV contributions up to and including the HOMO/SOMO - 1 orbital (MO 47) and separate HOMO/SOMO (MO 48) contribution. Middle: Added PV contributions up to and including MO 48 (HOMO/SOMO). Bottom: Artificial electron removal/addition in (R)-CHDBrI/(R)-CHDBrI<sup>+</sup> (left/right panel) by means of halving/doubling the HOMO/SOMO (MO 48) contribution.

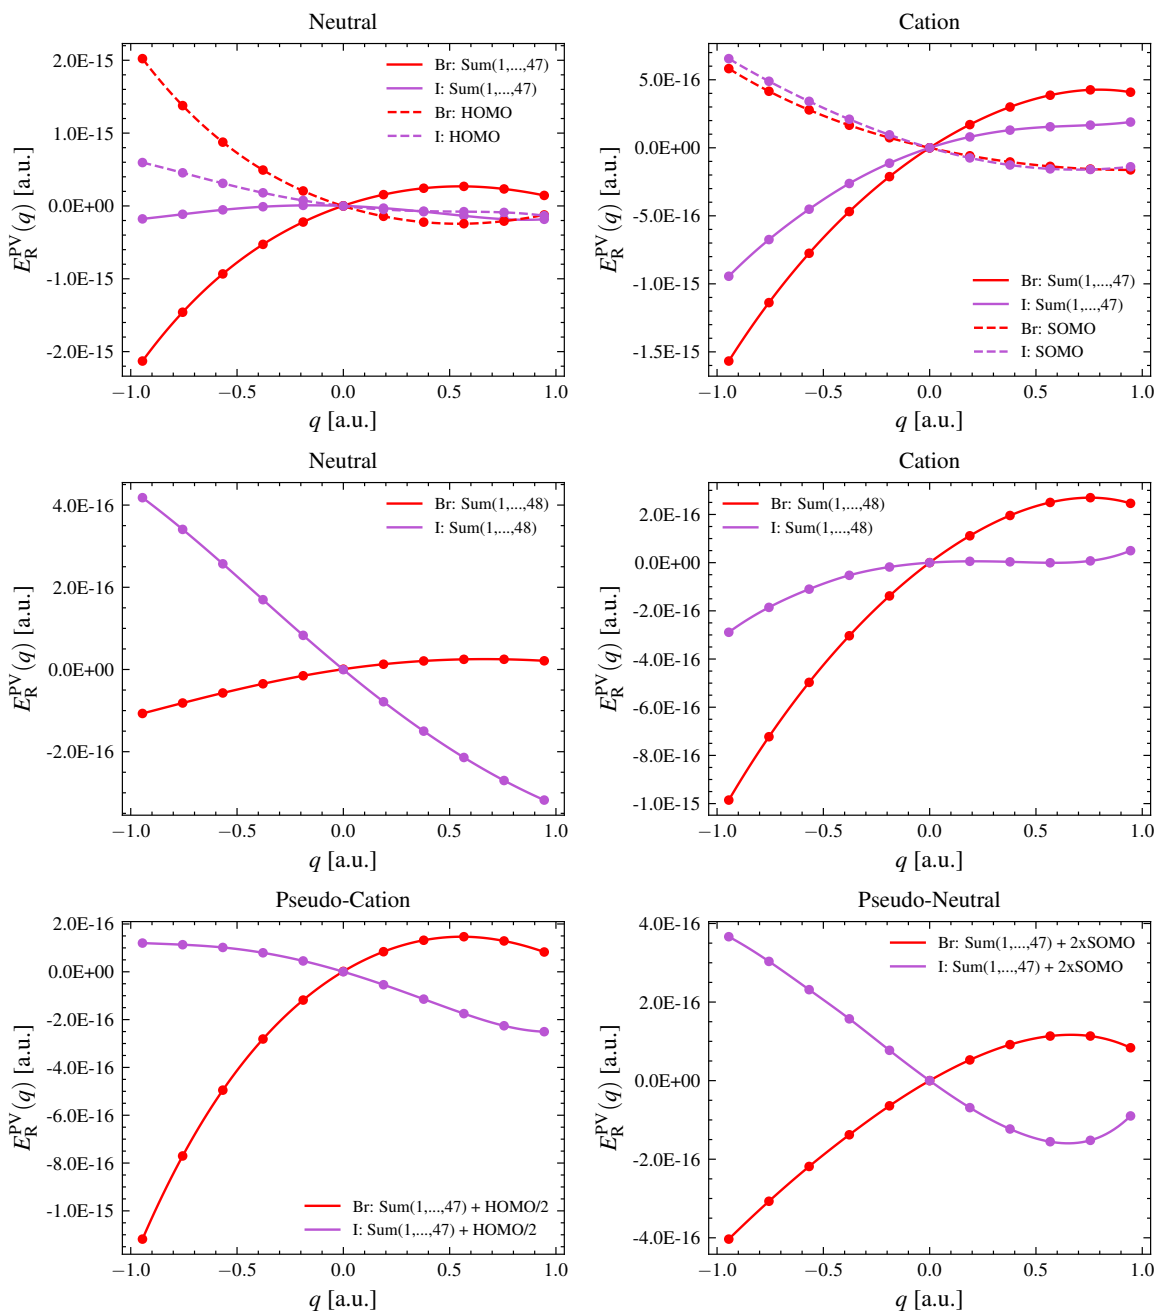

Figure S17: Orbital contributions of PV energies  $E^{PV}(q)$  along mode 7 in the neutral (left) and cation (right) of (R)-CHDBrI. Top: Added PV contributions up to and including the HOMO/SOMO - 1 orbital (MO 47) and separate HOMO/SOMO (MO 48) contribution. Middle: Added PV contributions up to and including MO 48 (HOMO/SOMO). Bottom: Artificial electron removal/addition in (R)-CHDBrI/(R)-CHDBrI<sup>+</sup> (left/right panel) by means of halving/doubling the HOMO/SOMO (MO 48) contribution.

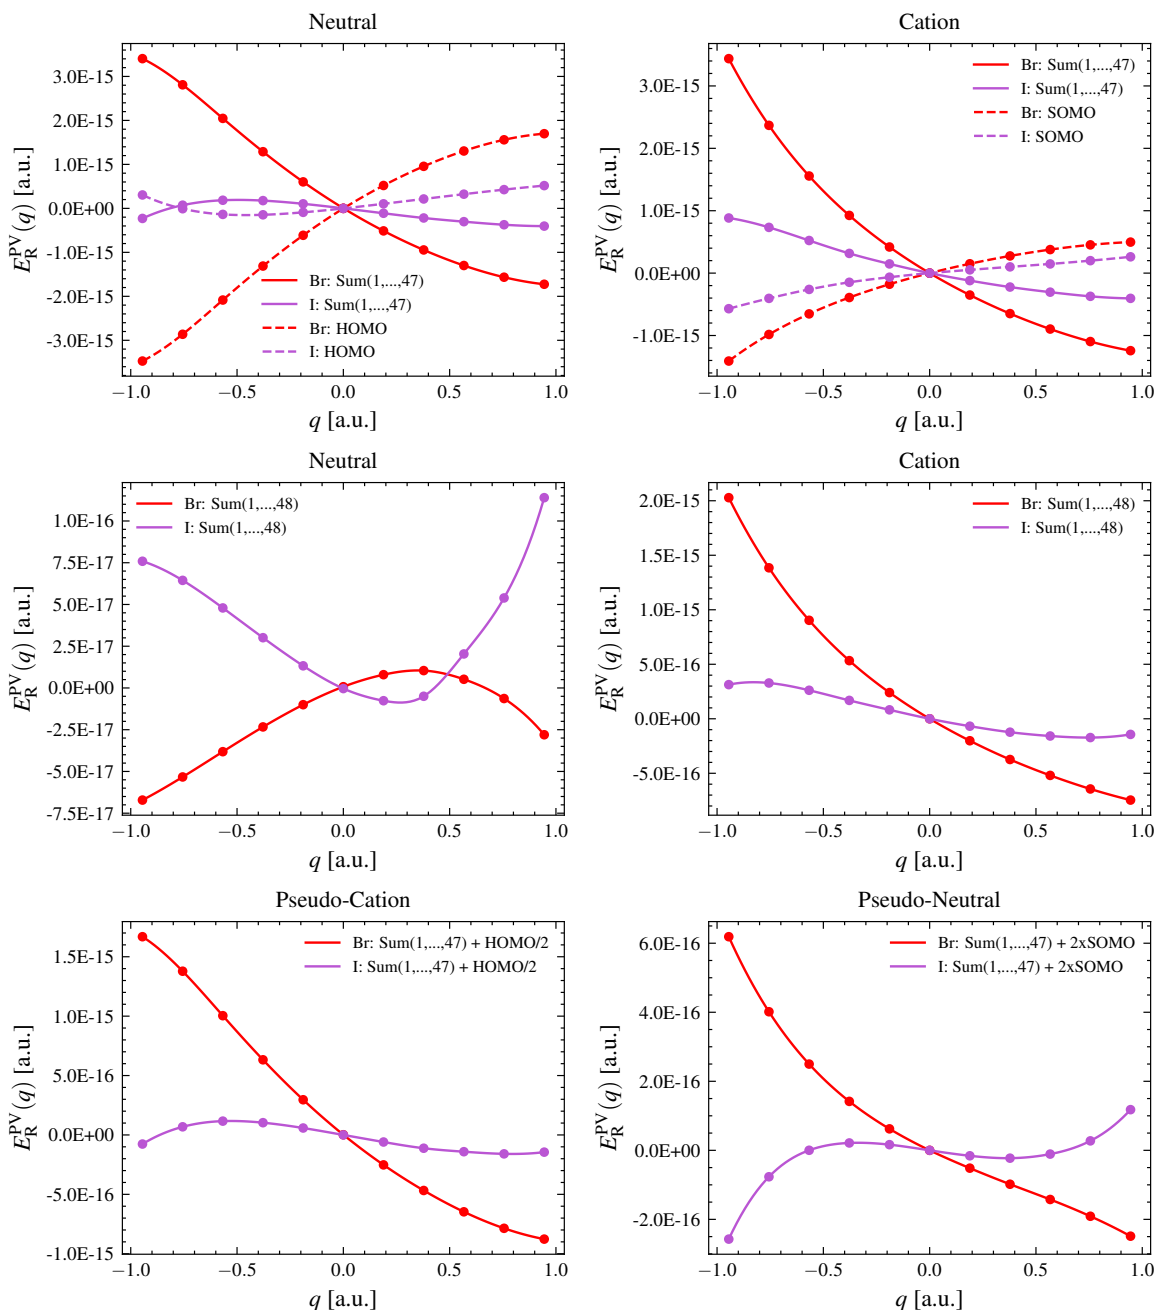

Figure S18: Orbital contributions of PV energies  $E_R^{PV}(q)$  along mode 8 in the neutral (left) and cation (right) of (R)-CHDBrI. Top: Added PV contributions up to and including the HOMO/SOMO - 1 orbital (MO 47) and separate HOMO/SOMO (MO 48) contribution. Middle: Added PV contributions up to and including MO 48 (HOMO/SOMO). Bottom: Artificial electron removal/addition in (R)-CHDBrI/(R)-CHDBrI<sup>+</sup> (left/right panel) by means of halving/doubling the HOMO/SOMO (MO 48) contribution.

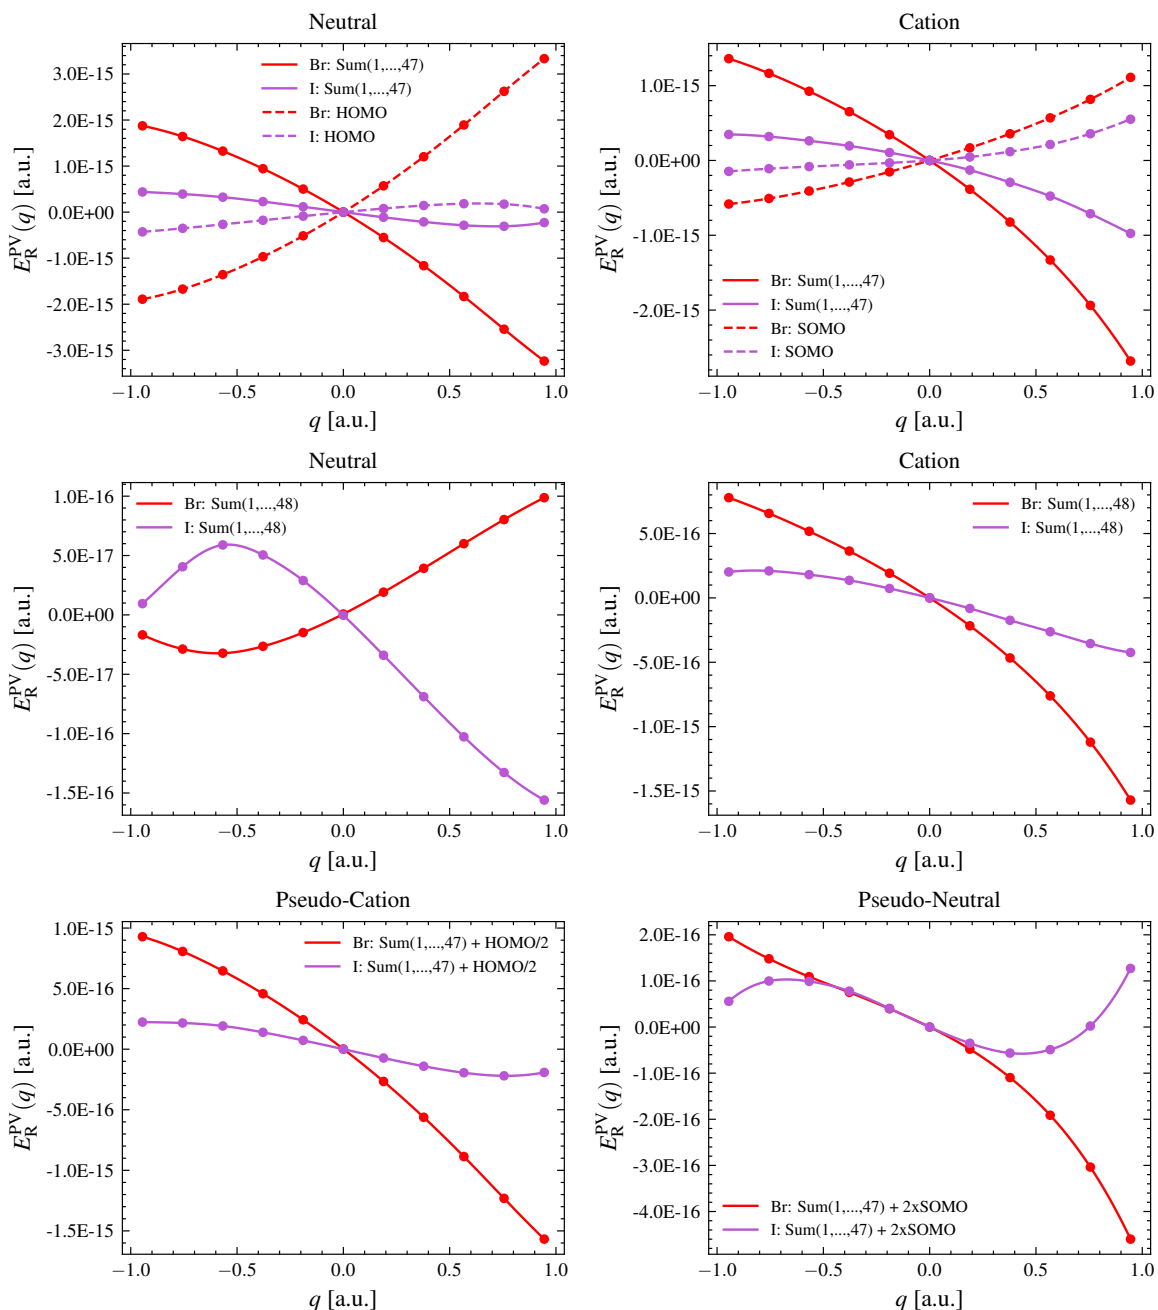

Figure S19: Orbital contributions of PV energies  $E_R^{PV}(q)$  along mode 9 in the neutral (left) and cation (right) of (R)-CHDBrI. Top: Added PV contributions up to and including the HOMO/SOMO - 1 orbital (MO 47) and separate HOMO/SOMO (MO 48) contribution. Middle: Added PV contributions up to and including MO 48 (HOMO/SOMO). Bottom: Artificial electron removal/addition in (R)-CHDBrI/(R)-CHDBrI<sup>+</sup> (left/right panel) by means of halving/doubling the HOMO/SOMO (MO 48) contribution.

## References

- (1) Clabo, D.; Allen, W. D.; Remington, R. B.; Yamaguchi, Y.; Schaefer, H. F. A systematic study of molecular vibrational anharmonicity and vibration—rotation interaction by self-consistent-field higher-derivative methods. Asymmetric top molecules. *Chemical Physics* **1988**, *123*, 187–239.
- (2) Barone, V. Anharmonic vibrational properties by a fully automated second-order perturbative approach. *The Journal of Chemical Physics* **2004**, *122*, 014108.
- (3) Carbonniere, P.; Lucca, T.; Pouchan, C.; Rega, N.; Barone, V. Vibrational computations beyond the harmonic approximation: Performances of the B3LYP density functional for semirigid molecules. *Journal of Computational Chemistry* **2005**, *26*, 384–388.
- (4) Rauhut, G.; Barone, V.; Schwerdtfeger, P. Vibrational analyses for CHFClBr and CDFClBr based on high level *ab initio* calculations. *The Journal of Chemical Physics* **2006**, *125*, 054308.
- (5) Thierfelder, C.; Rauhut, G.; Schwerdtfeger, P. Relativistic coupled-cluster study of the parity-violation energy shift of CHFClBr. *Physical Review A* **2010**, *81*, 032513.
- (6) Epifanovsky, E. et al. Software for the frontiers of quantum chemistry: An overview of developments in the Q-Chem 5 package. *The Journal of Chemical Physics* **2021**, *155*, 084801, 084801.
- (7) Mardirossian, N.; Head-Gordon, M.  $\omega$ B97M-V: A combinatorially optimized, range-separated hybrid, meta-GGA density functional with VV10 nonlocal correlation. *The Journal of Chemical Physics* **2016**, *144*, 214110.
- (8) Rappoport, D.; Furche, F. Property-optimized Gaussian basis sets for molecular response calculations. *The Journal of Chemical Physics* **2010**, *133*, 134105.
- (9) Frisch, M. J. et al. Gaussian~16 Revision C.01. 2016; Gaussian Inc. Wallingford CT.

- (10) Werner, H.-J.; Knowles, P. J.; Knizia, G.; Manby, F. R.; Schütz, M. Molpro: a general-purpose quantum chemistry program package. *Wiley Interdisciplinary Reviews: Computational Molecular Science* **2011**, *2*, 242–253.
- (11) Berger, R. In *Relativistic Electronic Structure Theory*; Schwerdtfeger, P., Ed.; Theoretical and Computational Chemistry; Elsevier, 2004; Vol. 14; pp 188–288.
- (12) Heß, B. A.; Marian, C. M.; Wahlgren, U.; Gropen, O. A mean-field spin-orbit method applicable to correlated wavefunctions. *Chemical Physics Letters* **1996**, *251*, 365–371.
- (13) Schimmelpfennig, B. AMFI, an atomic mean-field spin-orbit integral program. 1996 and 1999; University of Stockholm.
- (14) Dyall, K. G. Relativistic Quadruple-Zeta and Revised Triple-Zeta and Double-Zeta Basis Sets for the 4p, 5p, and 6p Elements. *Theoretical Chemistry Accounts* **2006**, *115*, 441–447.
- (15) DIRAC, a relativistic ab initio electronic structure program, Release DIRAC23 (2023), written by R. numerov, A. S. P. Gomes, T. Saue and L. Visscher and H. J. Aa. Jensen, with contributions from I. A. Aucar, V. Bakken, C. Chibueze, J. Creutzberg, K. G. Dyall, S. Dubillard, U. Ekström, E. Eliav, T. Enevoldsen, E. Faßhauer, T. Fleig, O. Fossgaard, L. Halbert, E. D. Hedegård, T. Helgaker, B. Helmich–Paris, J. Henriksson, M. van Horn, M. Iliaš, Ch. R. Jacob, S. Knecht, S. Komorovský, O. Kullie, J. K. Lærdahl, C. V. Larsen, Y. S. Lee, N. H. List, H. S. Nataraj, M. K. Nayak, P. Norman, A. Nyvang, G. Olejniczak, J. Olsen, J. M. H. Olsen, A. Papadopoulos, Y. C. Park, J. K. Pedersen, M. Pernpointner, J. V. Pototschnig, R. di Remigio, M. Repisky, K. Ruud, P. Sałek, B. Schimmelpfennig, B. Senjean, A. Shee, J. Sikkema, A. Sunaga, A. J. Thorvaldsen, J. Thyssen, J. van Stralen, M. L. Vidal, S. Villaume, O. Visser, T. Winther, S. Yamamoto and X. Yuan (available at <https://doi.org/10.5281/zenodo.7670749>, see also <https://www.diracprogram.org>).

- (16) Noumerov, B. V. A Method of Extrapolation of Perturbations. *Monthly Notices of the Royal Astronomical Society* **1924**, *84*, 592–602.
- (17) Cooley, J. W. An Improved Eigenvalue Corrector Formula for Solving the Schrodinger Equation for Central Fields. *Mathematics of Computation* **1961**,
- (18) Bast, R. Numerov v0.5.0. <https://doi.org/10.5281/zenodo.1000406>, 2017.
- (19) Schwerdtfeger, P.; Saue, T.; van Stralen, J. N. P.; Visscher, L. Relativistic second-order many-body and density-functional theory for the parity-violation contribution to the C–F stretching mode in CHFClBr. *Physical Review A* **2005**, *71*, 012103.
- (20) Rauhut, G.; Schwerdtfeger, P. Parity-violation effects in the vibrational spectra of CHFClBr and CDFClBr. *Physical Review A* **2021**, *103*, 042819.
- (21) Bailleux, S.; Dufлот, D.; Taniguchi, K.; Sakai, S.; Ozeki, H.; Okabayashi, T.; Bailey, W. C. Fourier Transform Microwave and Millimeter-Wave Spectroscopy of Bromiodomethane, CH<sub>2</sub>BrI. *The Journal of Physical Chemistry A* **2014**, *118*, 11744–11750.
- (22) El-Sabban, M. Z.; Danti, A.; Zwolinski, B. J. Normal-Coordinate Analysis and Molecular Properties of Four CH<sub>2</sub>XY Halomethanes (X = F or I; Y = Cl or Br). *The Journal of Chemical Physics* **1966**, *44*, 1770–1779.
- (23) Wu, T. Systematics in the Vibrational Spectra of the Halogen Derivatives of Methane. *The Journal of Chemical Physics* **2004**, *10*, 116–124.
- (24) Fiechter, M. R.; Haase, P. A. B.; Saleh, N.; Soulard, P.; Tremblay, B.; Havenith, R. W. A.; Timmermans, R. G. E.; Schwerdtfeger, P.; Crassous, J.; Darquié, B.; Pašteka, L. F.; Borschevsky, A. Toward Detection of the Molecular Parity Violation in Chiral Ru(acac)<sub>3</sub> and Os(acac)<sub>3</sub>. *The Journal of Physical Chemistry Letters* **2022**, *13*, 10011–10017.



(25) 2019; DIRAC, a relativistic ab initio electronic structure program, Release DIRAC19, written by A. S. P. Gomes, T. Saue, L. Visscher, H. J. Aa. Jensen, and R. Bast, with contributions from I. A. Aucar, V. Bakken, K. G. Dyall, S. Dubillard, U. Ekström, E. Eliav, T. Enevoldsen, E. Faßhauer, T. Fleig, O. Fossgaard, L. Halbert, E. D. Hedegård, B. Heimlich–Paris, T. Helgaker, J. Henriksson, M. Iliáš, Ch. R. Jacob, S. Knecht, S. Komorovský, O. Kullie, J. K. Lærdahl, C. V. Larsen, Y. S. Lee, H. S. Nataraj, M. K. Nayak, P. Norman, G. Olejniczak, J. Olsen, J. M. H. Olsen, Y. C. Park, J. K. Pedersen, M. Pernpointner, R. di Remigio, K. Ruud, P. Sałek, B. Schimmelpfennig, B. Senjean, A. Shee, J. Sikkema, A. J. Thorvaldsen, J. Thyssen, J. van Stralen, M. L. Vidal, S. Villaume, O. Visser, T. Winther, and S. Yamamoto (available at [uurlhttp://dx.doi.org/10.5281/zenodo.3572669](http://dx.doi.org/10.5281/zenodo.3572669), see also [uurlhttp://www.diracprogram.org](http://www.diracprogram.org)).
